# Supplementary material for: High potential for CH 4 emission mitigation from oil infrastructure in one of EU's major production regions
Source: Copernicus journal article supplement (doi:10.5194/acp-23-10399-2023), 2023-09-20
Supplement: Supplementary file 1 [file acp-23-10399-2023-supplement.pdf]

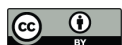

*Supplement of*

## **High potential for CH<sub>4</sub> emission mitigation from oil infrastructure in one of EU's major production regions**

**Foteini Stavropoulou et al.**

*Correspondence to:* Huilin Chen ([huilin.chen@rug.nl](mailto:huilin.chen@rug.nl)) and Thomas Röckmann ([t.roeckmann@uu.nl](mailto:t.roeckmann@uu.nl))

The copyright of individual parts of the supplement might differ from the article licence.

1 **Table of Contents**

2

3 S1. Overview of facility scale quantifications with all methods ..... 1

4 S2. Facility scale measurement methods ..... 2

5 S3. Statistical tests for lognormality ..... 5

6 S4. Determination of emissions distributions and emission factors ..... 6

7 S5. “Non-detects” and Detection Limit ..... 7

8 S6. Alternative determination of non-detects from screening data ..... 9

9 S7. Alternative up-scaling approaches ..... 10

10 S8. Sensitivity analysis of the statistical estimator ..... 15

11 S9. Histograms and fitted pdfs under the statistical estimator for each measurement

12 method used ..... 17

13 S10. Semi-quantitative evaluation of screening data ..... 17

14 S11. Component scale measurements ..... 19

15 S12. Comparison with CH<sub>4</sub> emissions reported from other studies ..... 20

16 S13. Production and age characteristics of surveyed oil production sites ..... 20

17 S14. Data ..... 22

18 References ..... 29

19

20

21 **S1. Overview of facility scale quantifications with all methods**

22 Table S1 provides an overview of the number of measurements performed with each

23 quantification approach at different types of production infrastructure during the ROMEO

24 campaign. Most of the quantifications were carried out for oil production sites, and thus the

25 present analysis focuses on this type of sites.

26 Table S1. Overview of the number of sampled types of sites for each measurement method

27 employed during the ROMEO campaign.

| Site Type                     | Number of sites |                  |                  |           |            |
|-------------------------------|-----------------|------------------|------------------|-----------|------------|
|                               | OTM-33A         | GPM <sup>a</sup> | TDM <sup>b</sup> | MBA       | Total      |
| Oil production sites          | 54              | 68               | 25               | 31        | 178        |
| Gas production sites          | 11              | 12               | 6                | 2         | 31         |
| Other facilities <sup>c</sup> | 6               | 30               | 19               | 8         | 63         |
| Unknown                       | 6               | 1                | -                | 2         | 9          |
| <b>Total</b>                  | <b>77</b>       | <b>111</b>       | <b>50</b>        | <b>43</b> | <b>281</b> |

28 OTM-33A: Other Test Method - 33A, GPM: Gaussian Plume Method, TDM: Tracer

29 Dispersion Method, MBA: Mass Balance

30 <sup>a</sup>This category includes both GPM and “Estimates” based on one mole fraction record.  
31 <sup>b</sup> BDL values estimated from the TDM team are not included in this table (see S2).  
32 <sup>c</sup>“Other facilities” include oil parks, gas compressor stations, oil deposits, oil and gas  
33 production batteries, disposal injection wells and sites mentioned as “other facilities”  
34 in the data provided by the O&G production operator.  
35

## 36 **S2. Facility scale measurement methods**

37 In the following we provide additional information on the deployment of each of the four site  
38 level quantification methods during the ROMEO campaign.  
39

### 40 **Tracer Dispersion Method**

41 The Tracer Dispersion Method (TDM) dataset and the evaluation approach that was  
42 implemented during the ROMEO campaign were previously described in Delre et al. (2022).

43 To release the tracer gas as closely as possible to the emission point, a flexible tube was  
44 pushed to the location of the well borehole by using a rod. In cases where this was not possible,  
45 such as at large area sources, the tracer was released from the side of the fence protecting the  
46 target area. Measurements of CH<sub>4</sub> and tracer gases concentrations were carried out by  
47 performing on average 9 downwind plume traverses. The site-representative methane emission  
48 rate was then calculated by averaging the emission rates estimated from the multiple traverses  
49 across the plume.

50 Delre et al. (2022) assigned upper limits of emission rates to sites where the measured plumes  
51 were Below Detection Limit (BDL). This means that the CH<sub>4</sub> mole fraction downwind a site was  
52 the same as upwind, within the analytical uncertainty. Upper limits for emission rates were  
53 assigned to these sites based on the lowest measurable emission rate that would have been  
54 detectable with the analyser. In this work, these BDL values are not used for the derivation of  
55 emission factors with our statistical approach, but they are used for the determination of the  
56 detection limit and the fraction of non-detects for the TDM dataset (see S5).  
57

### 58 **Other Test Method 33A**

59 The Other Test Method (OTM) - 33A dataset and application during the ROMEO campaign was  
60 previously described in Korbeń et al., (2022). OTM-33A is based on stationary observations of the  
61 mole fraction of trace gases, and quantification using wind direction and speed. When an  
62 emission plume has been detected downwind of an emission point from mobile screening (see  
63 below), the vehicle is parked in the plume and mole fraction and wind information are recorded  
64 over a period of approximately 20 minutes. The CH<sub>4</sub> emission rate Q can then be calculated  
65 applying Eq. 1 (Korbeń et al., 2022).

$$66 \quad Q = 2\pi \cdot \sigma_y \cdot \sigma_z \cdot U \cdot C \quad (1)$$

67 Where  $\sigma_y$  and  $\sigma_z$  are the horizontal and vertical dispersion coefficients, U is the horizontal mean  
68 wind speed, and C is the maximum CH<sub>4</sub> mole fraction calculated with a Gaussian fit algorithm.  
69

### 70 **Gaussian Plume Method**

71 Measurements with the Gaussian Plume Method (GPM) were additionally performed by the  
72 two teams carrying out quantifications using the TDM and OTM-33A approaches as mentioned

73 in the above sections, and the GPM dataset and application during the ROMEO campaign was  
74 also described in detail in (Korbeń et al., 2022) and (Delre et al., 2022).

75 To determine emission rates from a plume, the GPM calculates the average local-scale CH<sub>4</sub>  
76 dispersion using an idealized approximation and assuming constant meteorological conditions  
77 (Hanna et al., 1982). When a gas is released from an emission point, it is entrained in the  
78 prevailing ambient air flow (defined as the x direction) and the dispersion from the emission point  
79 creates an idealized cone while it disperses in the y and z direction over time. The mole fraction  
80 of the gas at any point, and eventually the emission rate, can be calculated by using information  
81 about the height of the source, wind speed and wind dispersion parameters (Riddick et al., 2017)  
82 and applying Eq. 2 (Turner, 1970; Korbeń et al., 2022).

$$83 \quad C(x, y, z) = \frac{Q}{2\pi\sigma_y\sigma_zU} \exp\left(-\frac{1}{2}\left(\frac{y}{\sigma_y}\right)^2\right) \left[\exp\left(-\frac{1}{2}\left(\frac{z-H}{\sigma_z}\right)^2\right) + \exp\left(-\frac{1}{2}\left(\frac{z+H}{\sigma_z}\right)^2\right)\right] \quad (2)$$

84 where  $\sigma_y$  and  $\sigma_z$  are the horizontal and vertical dispersion coefficients,  $U$  is the mean wind speed,  
85 and  $C$  is the maximum observed CH<sub>4</sub> mole fraction. This method can be used on public roads  
86 without site access and measurements can be carried out in a straightforward manner and a  
87 limited time. However, GPM modelling can introduce systematic errors that are difficult to  
88 quantify and result in errors on emission magnitudes of at least a factor of three, if not more  
89 (Yacovitch et al., 2015).

90 Because of site accessibility and/or wind conditions, some emitting sites could not be  
91 successfully quantified using the TDM. In these cases, the emission rates were calculated by  
92 fitting a Gaussian peak to the CH<sub>4</sub> enhancement recorded a few meters downwind of the site  
93 (conceptually similar to the “screening” evaluations described in section S10). This approach uses  
94 often only one single mole fraction record. Emission rates from this approach are referred to as  
95 “Estimate” and they are included in the group GPM here. Delre et al. (2022) compared emission  
96 rates derived from all three evaluation methods (TDM, GPM, “Estimates”) at 41 O&G sites. They  
97 found lower estimates from GPM and “Estimate” evaluations compared to TDM and applied a  
98 correction of a factor of 2 or more to the GPM and “Estimate” quantifications (Delre et al., 2022).  
99 As stated in the main text, we do not apply this correction to GPM measurements, since a  
100 comparison to TDM is not possible for the other measurement teams (Korbeń et al., 2022).

101 On several days of the ROMEO campaign, the C<sub>2</sub>H<sub>2</sub> analyser was not operational and the TDM  
102 could not be applied. During these days, the GPM was applied by the same team using a CH<sub>4</sub>  
103 analyser. Similarly, when the OTM-33A could not be applied, either because the topographic  
104 conditions were not suitable or because the wind conditions were not appropriate, the GPM was  
105 applied (Korbeń et al., 2022).

106

### 107 **Mass Balance Approach**

108 Two different UAV-based systems using a Mass Balance Approach (MBA) were used to  
109 quantify the emission rates from the surveyed oil and gas facilities. Due to their adaptability and  
110 flexibility, the two UAV-based methods have the advantage of being able to sample at locations  
111 that are hard to reach for traditional measurement methods, allowing quick adaptation of the  
112 measurement strategy according to changing wind conditions (Andersen et al. 2021; Morales et  
113 al. 2022). This possibility of rapid adaptation to changing wind conditions is highly valuable,  
114 especially when a large number of sources have to be quantified in a short amount of time, as  
115 was the case during the ROMEO measurement campaign. High sensitivity to wind conditions and  
116 a relatively short flight time can be seen as a slight drawback of the UAV-based quantifications

117 since the individual flight represents a brief snapshot of the plume (Morales et al., 2022). Here  
 118 we describe the differences in the MBA between the active AirCore system from the University  
 119 of Groningen (UG) and the Quantum Cascade Laser Absorption Spectrometer (QCLAS) from the  
 120 Swiss Federal Institute for Materials Science and Technology (EMPA).

121 The UG MBA has been described in Vinković et al. (2022). The total CH<sub>4</sub> flux in grams per  
 122 second (gs<sup>-1</sup>) of a source is derived as:

$$Q_{CH_4} = \bar{v} \cos \bar{\theta} M_{CH_4} \bar{n}_{dryair} \sum \sum \Delta c \Delta x \Delta z, \quad (3)$$

123 where  $\bar{v}$  is the mean horizontal wind speed,  $\bar{\theta}$  is the angle between the mean wind direction and  
 124 the flight trajectory,  $M_{CH_4}$  is the molecular mass of methane,  $\bar{n}_{dryair}$  is the molar density of dry  
 125 air,  $\Delta c$  is the enhancement of the CH<sub>4</sub> mole fraction above background, and  $\Delta x$  and  $\Delta z$  are the  
 126 horizontal and the vertical increments of the integration plane, respectively. The background was  
 127 determined as the 10<sup>th</sup> percentile of the downwind flight CH<sub>4</sub> measurements as in Vinković et al.  
 128 (2022). The total uncertainty is derived by error propagation, based upon the variability and  
 129 uncertainty in each variable of the equation 3.

130 The EMPA MBA uses a cluster analysis to separate elevated mole fractions from background  
 131 measurements, and then applies ordinary kriging to each of the two cluster to interpolate the  
 132 data in space (Morales et al. 2022). The emission rate  $Q_C$  (gs<sup>-1</sup>) is then derived as:

$$Q_C = \int_{y_{min}}^{y_{max}} \int_0^{z_{max}} c(y, z) u(y, z) \cdot \hat{n} dz dy, \quad (4)$$

133 Where the  $y$ -axis is aligned with the vertical cross-section. The integral over the 2D-plane is  
 134 approximated in the observations as a discrete summation of CH<sub>4</sub> enhancement  $c(y, z)$   
 135 multiplied with the component of the horizontal vector  $u(y, z)$  normal to the vertical cross-  
 136 section. The overall error is a function of the two variables  $c$  and  $u$ . The horizontal wind vector  
 137  $u(y, z)$ , referred to as projected wind in Morales et al. (2022), involved taking the 1 s average  
 138 normal wind component and projecting it onto the measurement plane by matching the  
 139 timestamp of the anemometer to the GPS location of the UAV during the time of measurement.  
 140 The CH<sub>4</sub> background was determined from measurements outside of the plume of interest  
 141 following the Robust Extract Baseline Signal algorithm (Ruckstuhl et al., 2012).

142 Both UG and EMPA measured local meteorological conditions using the 3D sonic anemometer  
 143 placed in the near vicinity of the source at heights of ~ 3 m (UG) and ~ 5 m (EMPA), with a  
 144 sampling frequency of 10 Hz (UG) and 20 Hz (EMPA). Since the anemometer was placed in close  
 145 proximity to the investigated source, the wind measurements were assumed to be  
 146 representative of the conditions encountered by the UAV. The main difference between these  
 147 two UAV-based MBA approaches lies in their treatment and incorporation of the wind. EMPA's  
 148 approach clusters measured methane mole fractions before kriging, where the normal wind  
 149 components of continuous wind measurements were projected onto the drone positions  
 150 (Morales et al., 2022). In contrast, UG applies the mean wind, observed throughout the flight,  
 151 uniformly to all measured methane mole fractions (Vinković et al. 2022).

152

153 **S3. Statistical tests for lognormality**

154 To examine if our sampled data follow a lognormal distribution, we first log-transform the  
 155 measured site-level emission rates. The Shapiro-Wilk and Lilliefors tests for normality are then  
 156 used to determine if the log-transformed data are normally distributed. These two tests are  
 157 appropriate in a situation where the parameters ( $\mu$  and  $\sigma$ ) of the null distribution are unknown.  
 158 Previous studies have found that the Shapiro-Wilk test is the most powerful normality test and  
 159 the performance of Lilliefors test is comparable with Shapiro-Wilk test (Razali and Wah, 2011).  
 160 We perform the tests for the subset of oil production sites including measurements above the  
 161 detection limit of each method. The null hypothesis for the tests is that the log transformed  
 162 emissions data comes from a normal distribution, with critical P-value of 0.05. The statistical tests  
 163 were performed in *Python* using the scientific computation libraries *SciPy* (Virtanen et al., 2020)  
 164 and *statsmodels* (Seabold and Perktold, 2010).

165 Table S2 shows the results from both statistical tests for each tested dataset. For the subset  
 166 of oil production sites, the null hypothesis of lognormality is accepted by both the Shapiro-Wilk  
 167 and Lilliefors test for all four measurement methods. Therefore, we conclude that for oil  
 168 production sites, the assumption that the distribution of site-level emissions rates above the  
 169 detection limit follows a lognormal distribution is valid. For the screenings, the null hypothesis of  
 170 lognormality is rejected for three out of five datasets. We decide to apply the statistical estimator  
 171 for the subset of oil production sites to qualitatively compare the results between the  
 172 quantifications and the screenings. However, we acknowledge that the lognormal distribution  
 173 might not characterize the distribution from the screenings accurately.

174 Table S2. Results from the Shapiro-Wilk test and the Lilliefors test of lognormality for each tested  
 175 dataset.

| Grouping                | Shapiro – Wilk test  |        | Lilliefors test      |        |
|-------------------------|----------------------|--------|----------------------|--------|
|                         | P-value <sup>a</sup> | Result | P-value <sup>a</sup> | Result |
| OTM-33A                 | 0.723                | Pass   | 0.229                | Pass   |
| GPM                     | 0.177                | Pass   | 0.504                | Pass   |
| TDM                     | 0.100                | Pass   | 0.096                | Pass   |
| MBA                     | 0.494                | Pass   | 0.682                | Pass   |
| All quantifications     | 0.121                | Pass   | 0.646                | Pass   |
| Screenings <sup>b</sup> |                      |        |                      |        |
| Vehicle 1               | 0.018                | Fail   | 0.001                | Fail   |
| Vehicle 2               | 0.940                | Pass   | 0.573                | Pass   |
| Vehicle 3               | 0.377                | Pass   | 0.722                | Pass   |
| Vehicle 4               | 0.036                | Fail   | 0.015                | Fail   |
| Vehicle 5               | 0.002                | Fail   | 0.013                | Fail   |
| Combined vehicles       | 0.002                | Fail   | 0.050                | Pass   |

176 <sup>a</sup>A dataset with P value above 0.05 is considered as evidence for the  
 177 lognormal distribution of the dataset, indicating that the datasets “pass”  
 178 the test for lognormality.

179 <sup>b</sup>Screenings were performed using five different vehicles and results were

180 separated accordingly into five different datasets.

181

#### 182 **S4. Determination of emissions distributions and emission factors**

183 In this study, we estimate emissions probability density functions (pdfs) that follow a  
184 lognormal distribution using a mathematical approach that has been used in previous  
185 publications (Zavala-Araiza et al., 2015, 2018; Alvarez et al., 2018; Robertson et al., 2020). These  
186 pdfs are then used to derive representative site-level emission Factors (EF) that consider the  
187 effect of the low probability but high-emission sites that describe skewed distributions.

188 Let  $x$  be the natural logarithm of CH<sub>4</sub> emissions (in kg h<sup>-1</sup>) measured at a site. Since  $x$  is normally  
189 distributed, the pdf of observing a single data point  $x$ , is given by:

$$190 \quad p(x|\mu, \sigma) = \frac{1}{\sigma\sqrt{2\pi}} e^{-\frac{(x-\mu)^2}{2\sigma^2}} \quad (5)$$

191 Where  $\mu$  and  $\sigma$  denote the mean and the standard deviation of the log-transformed data. We  
192 define  $\Phi(x)$  as the cumulative standard normal:

$$193 \quad \Phi(x) = \int_{-\infty}^x \frac{1}{\sqrt{2\pi}} e^{-\frac{\partial^2}{2}} d\partial \quad (6)$$

194 And:

$$195 \quad \int_{-\infty}^x p(\partial|\mu, \sigma) d\partial = \Phi\left(\frac{x-\mu}{\sigma}\right) \quad (7)$$

196 The natural logarithm of the likelihood function, or log-likelihood function is:

$$197 \quad l(\mu, \sigma) = S_o \ln \Phi\left(\frac{DL-\mu}{\sigma}\right) - S_r \ln \sigma - \sum_{i=1}^{S_r} \frac{(x_i-\mu)^2}{2\sigma^2} \quad (8)$$

198 where  $DL$  is the Detection Limit, or the lowest detectable emission rate, of each quantification  
199 method,  $S_o$  is the number of measurements at or below the detection limit and  $S_r$  is the number  
200 of measurements above the detection limit. The role and significance of selecting the detection  
201 limit and the impact of the number of measurements below that limit are discussed in detail in  
202 sections S5 and S8.

203 We use Maximum Likelihood Estimation (MLE) to derive the parameters  $\mu$  and  $\sigma$  by performing  
204 an optimisation routine which maximises Eq. 8. MLE is a popular method that allows us to use  
205 the observed data to estimate the parameters of the probability distribution that generated this  
206 observed sample. We also use a direct search algorithm to calculate 95 % confidence intervals  
207 (CI) by inverting the Likelihood Ratio Test, a statistical test used to compare the goodness of fit  
208 between two models (Zavala-Araiza et al., 2015). We can then use the maximum likelihood  
209 estimated parameters to derive a central, site-level emission factor on the arithmetic scale, EF,  
210 defined as:

$$211 \quad EF = e^{\mu + \frac{1}{2}\sigma^2} \quad (9)$$

212 Emission distributions can be characterized following this approach for sufficiently large  
213 sample sizes (i.e., approximately >25 samples; Alvarez et al. 2018 ). Zavala-Araiza et al. (2015)  
214 provides an extensive description of this statistical approach as well as additional variations or  
215 constrains of this method.

216 This statistical estimator approach is our default method for the determination of emissions  
217 distributions and emission factors. In addition to the statistical estimator, we use alternative  
218 approaches to determine the whole basin emission factor by separating data from each  
219 measurement method (OTM-33A, GPM, TDM, MBA) into two regions, referred to as “east” and  
220 “west” parts of the production basin (see Fig. 1 in main text). In this approach, the non-detects  
221 were added based on the lowest measured value per method and per region (Table S3). In this  
222 approach, methods that have measured very low values do not need non-detects. A more  
223 detailed description and the results of this approach can be found in Section S7.

224

## 225 **S5. “Non-detects” and Detection Limit**

226 To ensure that our emission factor estimates are as representative as possible of the emission  
227 distribution of the total population of oil production sites in the studied regions, the  
228 implementation of the statistical estimator requires information about the detection limit of each  
229 method and the number of sites emitting at an emission rate below this detection limit, the so  
230 called “non-detects”. The original measurements below the detection limit of each method (if  
231 there are any) are replaced by a (typically larger) number of censored data based on the  
232 estimated fraction of non-detects (see below).

233 Korbeń et al. (2022) evaluated data from the screening vehicles to estimate the number of  
234 sites below the detection limit for the OTM-33A method. Using a minimum enhancement above  
235 background of 200 ppb for the application of the OTM-33A technique, they determined a fraction  
236 of 35 % of non-detects for the subset of oil production sites. The detection limit of the OTM-33A  
237 has been discussed in previous studies. Brantley et al. (2014) determined the detection limit of  
238 OTM-33A method equal to  $0.036 \text{ kg h}^{-1}$ . Robertson et al. (2020) performed a sensitivity analysis  
239 using different detection limits but since no significant effect on the results was found, they also  
240 determined the detection limit as  $0.036 \text{ kg h}^{-1}$ . For the ROMEO measurements, Korbeń et al.  
241 (2022) determined the detection limit as  $0.11 \text{ kg h}^{-1}$ , which is the lowest emission rate measured  
242 using OTM-33A in this study. We use this value for our analysis and apply it as well to the GPM  
243 dataset because the OTM-33A and GPM measurements were partly carried out by the same  
244 teams following a consistent site selection approach (Korbeń et al., 2022).

245 For the UAV-based measurements, for our reference statistical approach the detection limit  
246 is set equal to the lowest quantified value of two UAV-based datasets, which is the same as for  
247 the OTM-33A method,  $0.11 \text{ kg h}^{-1}$ . Since the lowest quantified value of these two measurements  
248 methods is the same and they visited approximately the same regions, we also use the same  
249 percentage of non-detects as the OTM-33A method, thus 35%. For the alternative statistical  
250 approaches A3-A6 (See S7) the detection limit is also set to the lowest quantified value, but per  
251 region, which is  $0.11$  and  $0.20 \text{ kg h}^{-1}$  for the regions “west” and “east”, respectively. We determine  
252 the percentage of non-detects to be equal to 38 % for region “west”, and 55 % for region “east”.

253 For the TDM quantifications, the number of the BDL sites (see S1) can be directly used as  $S_0$   
254 for the TDM quantifications. This leads to a fraction of 27 % for oil production sites for the TDM  
255 method. For the derivation of the detection limit, we use the average of the calculated upper  
256 limit emission rates assigned to the sites with emissions BDL. This leads to a detection limit of  
257  $0.07 \text{ kg h}^{-1}$ . Roscioli et al. (2015) reported the detection limit of TDM equal to  $0.02 \text{ kg h}^{-1}$ . Because  
258 of unfavourable meteorological conditions during the three-week campaign in Romania, in  
259 particular low and unstable wind speed, it is reasonable that the detection limit is higher in our  
260 study.



261 We can also use the screening dataset to obtain independent information about the number  
 262 of sites below the detection limit of our measurement methods. 217 oil production sites had  
 263 normalized CH<sub>4</sub> enhancements lower than 2.2 ppm, accounting for 32 % of the total number of  
 264 screened oil production sites that were assigned to the normalized enhancements. As mentioned  
 265 above, the value of 2.2 ppm is considered as the limit for OTM-33A (Korbeń et al., 2022). For a  
 266 limit of 1.9 ppm, we get a fraction of 30 %, whereas for a higher limit of 2.5 ppm, we get a fraction  
 267 of 35 %. These percentages are comparable to the value of 35 % that we used for the derivation  
 268 of emission factors (for OTM-33A, GPM and MBA), based on the results of Korbeń et al. (2022),  
 269 and 27 % (for TDM), based on the fraction of BDL values from the TDM team (Delre et al., 2022).  
 270 An alternative approach to determine the percentage of non-detects for each measurement  
 271 method using the screening data is described in section see S6.

272 The effect on the lognormal fit and the final EFs was further evaluated by testing several  
 273 different values for the detection limit and the fraction of non-detects (see S8). We find that by  
 274 decreasing the value of the detection limit or by increasing the fraction of non-detects, the  
 275 estimated EFs increase, due to the widening of the distribution towards the lower end. To avoid  
 276 overestimating the fraction of non-detects, and thus leading to an erroneously large estimate of  
 277 the EFs, we perform the calculations with a smaller fraction of non-detects. We consider that a  
 278 certain portion, specifically 2/3, of the non-detects are zero-emitters, e.g., sites without any  
 279 emissions. This approach is referred to as our reference scenario (A1) and is discussed in the main  
 280 text.

281 Table S3 provides an overview of the different detection limits and percentages of non-detects  
 282 used for each statistical method A1-A4 that have been performed to evaluate the ROMEO oil  
 283 production site measurements. Table S10 (section S7) provides an overview of the estimated  
 284 parameters  $\mu$ ,  $\sigma$  and EF, and a description of these different statistical methods A1-A6.

285 Table S3. Summary of the different detection limits and percentages of non-detects used for each  
 286 different approach.

| Method  | Ref [whole basin]        |                    |                          |                    | A3&A4                    |                    |                          |                    |
|---------|--------------------------|--------------------|--------------------------|--------------------|--------------------------|--------------------|--------------------------|--------------------|
|         | A1                       |                    | A2                       |                    | East region              |                    | West region              |                    |
|         | DL [kg h <sup>-1</sup> ] | S <sub>o</sub> [%] | DL [kg h <sup>-1</sup> ] | S <sub>o</sub> [%] | DL [kg h <sup>-1</sup> ] | S <sub>o</sub> [%] | DL [kg h <sup>-1</sup> ] | S <sub>o</sub> [%] |
| OTM-33A | 0.11                     | 12                 | 0.11                     | 35                 | 0.40                     | 70                 | 0.11                     | 39                 |
| GPM     | 0.11                     | 12                 | 0.11                     | 35                 | 1×10 <sup>-3</sup>       | -                  | 0.03                     | 12                 |
| TDM     | 0.07                     | 9                  | 0.07                     | 27                 | 1.2×10 <sup>-3</sup>     | -                  | 6.5×10 <sup>-3</sup>     | -                  |
| MBA     | 0.11                     | 12                 | 0.11                     | 35                 | 0.20                     | 55                 | 0.11                     | 38                 |

287 A1-Reference, see section S4, A2-Same as reference approach but with higher # of non-detects, A3-Per  
 288 method & different # non detects, A4-Per region & different # non-detects, A5-Per method & no non-  
 289 detects, A6-Per region & no non-detects (A5&A6 use the same DL as A3&A4 but zero S<sub>o</sub> and therefore not  
 290 included separately in the above table). S<sub>o</sub> is the number of measurements at or below the detection limit  
 291 of each measurement method.

292

293

## S6. Alternative determination of non-detects from screening data

294 To derive an alternative estimate for the number of non-detects, we investigate the  
 295 correlation between the CH<sub>4</sub> emission rate determined for the quantified sites and the maximum  
 296 observed CH<sub>4</sub> mole fraction observed at the same site from the screening data. We expect that  
 297 in general higher emission rates should correspond to higher mole fractions during the screening  
 298 phase, but local meteorological conditions will strongly affect the correlation for individual  
 299 points. Therefore, screenings are not sufficient for an emission quantification since they are  
 300 short-term observations and not done under controlled and reproducible conditions. In addition,  
 301 the direct comparison is hampered by the fact that the quantifications and screenings are  
 302 performed at different times and emissions likely vary over time. Nevertheless, when visiting a  
 303 lot of sites, the effects of these factors are expected to average out and we use the overall  
 304 correlation for a statistical analysis. The obtained correlation based on 85 matching pairs has a  
 305 slope of 0.0196 kg h<sup>-1</sup> / ppm and a correlation coefficient of R<sup>2</sup> = 0.53.

306 The slope determined from the correlation can be used to roughly estimate (on a statistical  
 307 basis, not on an individual site basis) emission rates and a probability distribution for an  
 308 additional set of 883 oil production sites from the screening dataset. When we treat this  
 309 distribution with our statistical estimator approach, we obtain mean and width of the distribution  
 310 of as  $\mu = -1.81$  and  $\sigma = 1.5$ . We then use this distribution to attain information about the non-  
 311 detects (Table S4) for each method (MBA, OTM-33a, GPM, TDM). Defining DL as the lowest  
 312 emission rate measured for each method and knowing the estimated  $\mu$  and  $\sigma$  parameters of the  
 313 distribution through a z-score<sup>1</sup>, a percentage of corresponding non-detects was determined for  
 314 each method by calculating the fraction of values less than that DL. Note that this does not mean  
 315 that the used methods (MBA, OTM-33a, GPM, TDM) cannot quantify emissions below defined  
 316 detection limit, only that they generally did not measure emissions below that threshold during  
 317 the ROMEO campaign.

318 The investigated basin can also be divided into two regions, i.e., east and west (Fig. 1, main  
 319 text) and the approach can be performed for the quantifications in both parts individually. Thus,  
 320 Table S4 gives an overview of parameters together with non-detects for each method (MBA,  
 321 OTM33a, GPM, TDM) for two different regions (E, W).

322

323 Table S4. Overview of parameters for each method (MBA, OTM33a, GPM, TDM) for two different regions,  
 324 east (E) and west (W).

| Method  | Region | Nr. Sites | Min = DL [kg h <sup>-1</sup> ] | Max [kg h <sup>-1</sup> ] | S <sub>0</sub> [%] | S <sub>r</sub> [nr.] | Total [nr.] | $\mu$  | $\Sigma$ |
|---------|--------|-----------|--------------------------------|---------------------------|--------------------|----------------------|-------------|--------|----------|
| OTM-33A | E      | 15        | 0.40                           | 7.7                       | 30 [70 %]          | 13                   | 43          | -2.06* | 2.42*    |
| GPM     | E      | 63        | 6x10 <sup>-4</sup>             | 39                        | x [-]**            | 63                   | 63          | -0.21  | 2.57     |
| TDM     | E      | 19        | 12x10 <sup>-4</sup>            | 27                        | x [-]**            | 19                   | 19          | -0.13  | 2.40     |
| MBA     | E      | 14        | 0.20                           | 6.5                       | 16 [55 %]          | 13                   | 29          | -1.74* | 2.13*    |
| OTM-33A | W      | 39        | 0.11                           | 73                        | 24 [39 %]          | 38                   | 62          | -1.05* | 2.54*    |
| GPM     | W      | 7         | 0.03                           | 46                        | 1 [12 %]           | 6                    | 7           | -0.31* | 2.84*    |
| TDM     | W      | 8         | 65x10 <sup>-4</sup>            | 1.5                       | x [-]**            | 8                    | 8           | -1.47  | 2.00     |

$$^1 z - score = \frac{\log(x_{min}) - \mu}{\sigma}$$

|     |   |    |      |    |           |    |    |        |       |
|-----|---|----|------|----|-----------|----|----|--------|-------|
| MBA | W | 17 | 0.11 | 18 | 10 [38 %] | 16 | 26 | -1.19* | 2.43* |
|-----|---|----|------|----|-----------|----|----|--------|-------|

325 \*  $\mu$  and  $\sigma$  calculated using the statistical estimator

326 \*\* no non-detects were added due to very low quantified emissions

327 DL - detection limit,  $S_0$  - number of measurements equal or below DL,  $S_r$  - number of measurements above  
328 DL

329

### 330 **S7. Alternative up-scaling approaches**

331 Using the alternative approach presented in S6 to determine the non-detects for each method  
332 per region, we were able to upscale our emissions to (a) regional and (b) basin-scale. Upscaling  
333 is based on the density of normal mixture<sup>1</sup>, using the existing function `rnormMix` from the R  
334 package 'EnvStats'. The 95 % CI was determined using the R package 'boot' for a non-parametric  
335 bootstrap method (Canty and Ripley, 2021). The main differences between this approach and the  
336 statistical estimator method are following:

- 337 (i) each measurement method dataset (OTM-33A, GPM, TDM, MBA) is split into two  
338 regions (east/west),  
339 (ii) the corresponding percentages of non-detects were added to each measurement  
340 method dataset (OTM-33A, GPM, TDM, MBA) according to the lowest regional  
341 measured value (Table S5).  
342

343 The results of the regional analysis and selected groups of methods are presented in Table S5  
344 and Fig. S1. Both regions have similar width of the distribution (Fig. S1), and relatively large 95 %  
345 CI due to the small sample size and large variability of the CH<sub>4</sub> emission factor. Nevertheless, we  
346 derive comparable estimates in both regions, with a difference of ~ 9 % between the central  
347 estimates of 9.9 kg h<sup>-1</sup> site<sup>-1</sup> and 9.1 kg h<sup>-1</sup> site<sup>-1</sup>. When all quantifications from the eastern and  
348 western region are combined, we get a central estimate of CH<sub>4</sub> emission level equal to 9.9 kg h<sup>-1</sup>  
349 (7.2 - 14, 95 % CI).

350 Table S5. Overview of emission factors for the eastern and western part of the basin. Approach  
351 referred to as A4.

| Method        | Region      | $\mu$ | $\sigma$ | EF [kg h <sup>-1</sup> site <sup>-1</sup> ] | 95 % CI |
|---------------|-------------|-------|----------|---------------------------------------------|---------|
| MBA + OTM-33A | E           | -1.87 | 2.28     | 2.1                                         | 1.6–2.3 |
| GPM + TDM     | E           | -0.14 | 2.49     | 19                                          | 14–27   |
| TOTAL E       | E           | -0.96 | 2.55     | 9.9                                         | 7.2–14  |
| MBA + OTM-33A | W           | -1.09 | 2.49     | 7.5                                         | 5.5–10  |
| GPM + TDM     | W           | -0.87 | 2.53     | 10                                          | 7.0–15  |
| TOTAL W       | W           | -0.94 | 2.51     | 9.1                                         | 6.6–13  |
| TOTAL         | Whole basin | -0.93 | 2.54     | 9.9                                         | 7.2–14  |

352

<sup>1</sup>  $g(x, \mu_1, \sigma_1, \mu_2, \sigma_2) = (1 - p)f(x, \mu_1, \sigma_1) + pf(x, \mu_2, \sigma_2);$   
 $\mu$  - mean;  $\sigma$  - sd;  $p$  - mixing probability vector [0.5]

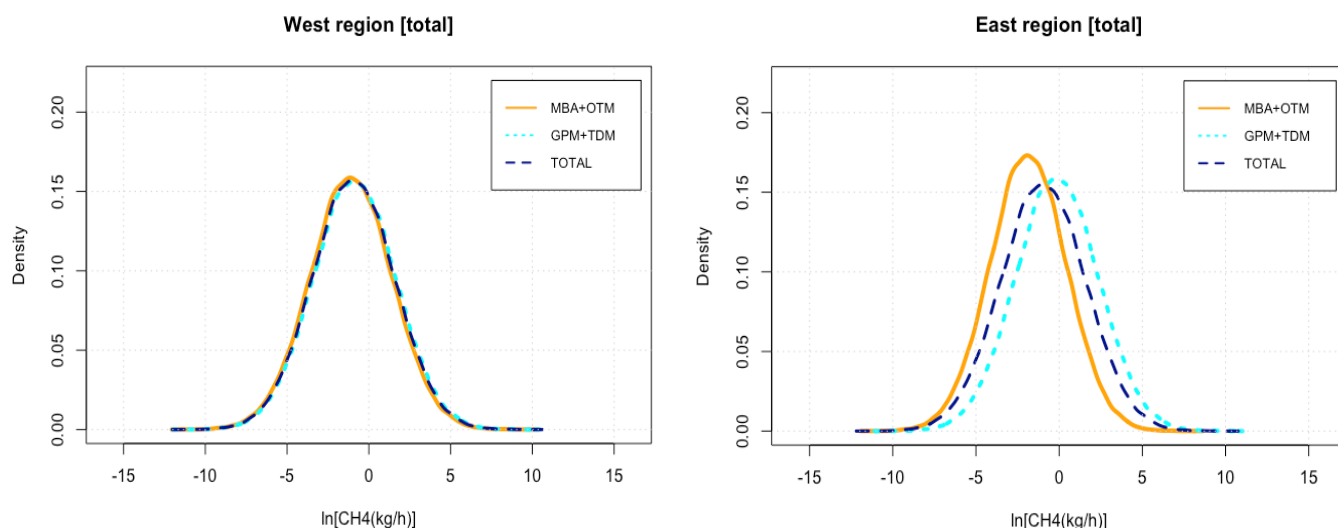

353  
 354  
 355 Figure S1. Fitted pdfs for the eastern (a) and western part of the basin (b). The dark blue dashed line  
 356 presents the total distribution as a mixture of all four quantification methods (MBA, OTM, GPM, TDM) in  
 357 the eastern and western part, respectively.  
 358

359 Table S6 and Fig. S2 show the results of another alternative statistical approach, where the  
 360 quantifications are evaluated for the individual methods. The subset of sites evaluated with the  
 361 GPM method leads to the highest EFs, and the sites evaluated with the MBA to the lowest EFs.  
 362 The overall basin-wide evaluation of the total set of quantifications again returns an emission  
 363 factor close to the reference approach,  $9.6 \text{ kg h}^{-1} \text{ site}^{-1}$ .

364 Table S6. Summary of the total  $\text{CH}_4$  basin emission factors upscaled from the four different measurement  
 365 methods (OTM-33A, GPM, TDM, MBA). Approach referred to as A3.  
 366

| Method  | $\mu$ | $\sigma$ | EF [ $\text{kg h}^{-1} \text{ site}^{-1}$ ] | 95 % CI |
|---------|-------|----------|---------------------------------------------|---------|
| OTM-33A | -1.51 | 2.54     | 5.6                                         | 4.0–7.8 |
| GPM     | -0.23 | 2.71     | 31                                          | 22–46   |
| TDM     | -0.78 | 2.31     | 6.5                                         | 4.9–8.8 |
| MBA     | -1.43 | 2.31     | 3.4                                         | 2.6–4.6 |
| TOTAL   | -0.96 | 2.54     | 9.6                                         | 7.0–14  |

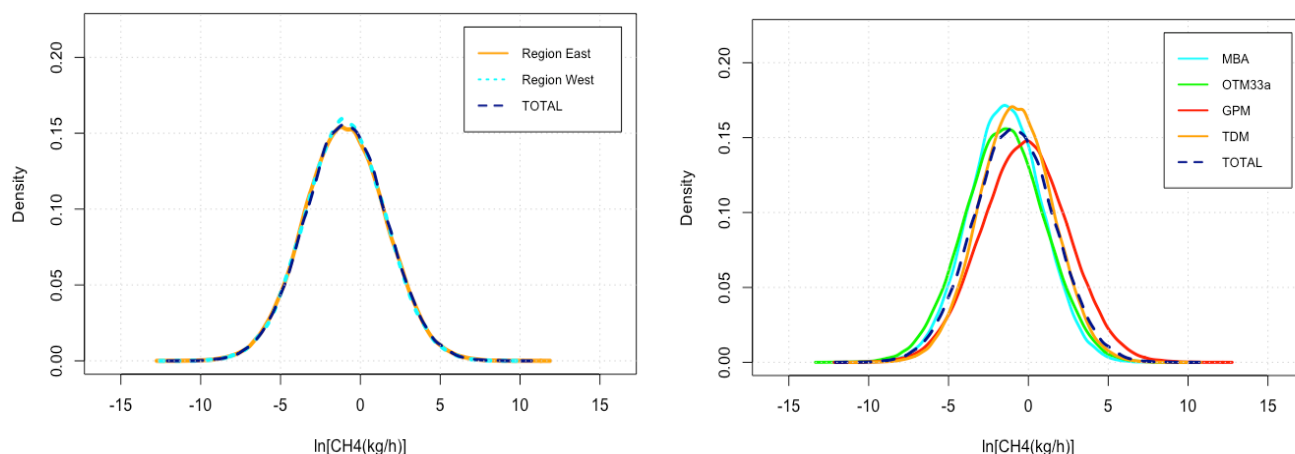

367  
 368  
 369 Figure S2. Fitted pdfs derived from the alternative upscaling approaches: per region (left) and  
 370 measurement method (right). The dark blue dashed line shows the total basin distribution.

371 Finally, we add a separate mode of zero emitters also for these alternative statistical  
 372 approaches. This means that instead of adding non-detects to the evaluation with the statistical  
 373 estimator, we treat the fraction of sites with emission rates BDL as sites that do not emit any CH<sub>4</sub>.  
 374 This is again performed for the entire population of quantifications, for the different regions and  
 375 the different methods. Results are shown in Table S7 and S8 and Fig. S3.

376 Table S7. Overview of the total CH<sub>4</sub> basin emission factors per region (east, west) upscaled using the zero-  
 377 mode approach, referred to as A6.

| Region | $\mu$               | $\sigma$ | EF [kg h <sup>-1</sup> site <sup>-1</sup> ] | 95 % CI |
|--------|---------------------|----------|---------------------------------------------|---------|
| East   | -0.14               | 1.92     | 7.3                                         | 5.9–9.0 |
| West   | $-3 \times 10^{-4}$ | 1.97     | 7.0                                         | 5.7–8.7 |
| TOTAL  | -0.09               | 1.95     | 7.3                                         | 5.9–9.1 |

378  
 379 Table S8. Summary of the total CH<sub>4</sub> basin emission factors per method upscaled using the zero-mode  
 380 approach, referred to as A5.

| Method  | $\mu$ | $\sigma$ | EF [kg h <sup>-1</sup> site <sup>-1</sup> ] | 95 % CI |
|---------|-------|----------|---------------------------------------------|---------|
| OTM-33A | 0.65  | 1.14     | 3.7                                         | 2.4–5.8 |
| GPM     | -0.15 | 2.56     | 22                                          | 8.8–64  |
| TDM     | -0.52 | 2.38     | 9.8                                         | 2.6–46  |
| MBA     | 0.21  | 1.22     | 2.6                                         | 1.6–4.3 |
| TOTAL   | 0.09  | 1.98     | 7.8                                         | 6.2–10  |

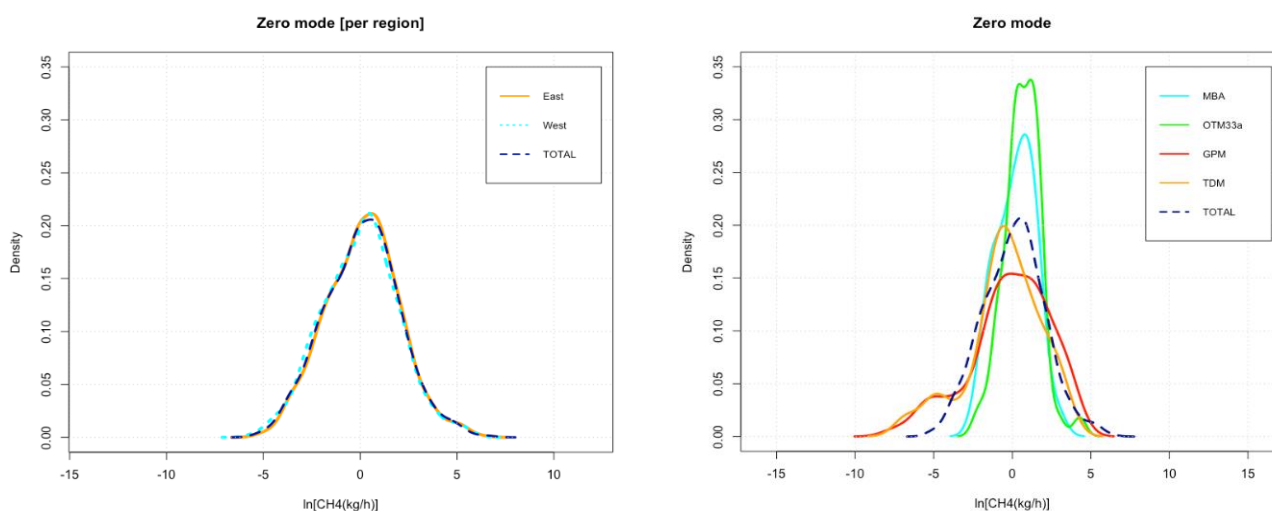

382  
383  
384 Figure S3. Fitted pdfs derived from the zero-mode upscaling method: per region (left) and measurement  
385 method (right). The dark blue dashed line shows the total basin distribution as mixture.

386 The final additional estimate of the total CH<sub>4</sub> basin EFs is calculated using the reference  
387 statistical approach but with a higher fraction of non-detects. This modification of our reference  
388 approach uses the original fraction of non-detects discussed in section S5 without assuming a  
389 separate mode of zero emitters. Table S9 summarizes the key parameters and derived EFs and  
390 Fig. S4 shows the pdfs generated from this modification of the statistical estimator.

391 Table S9. Summary of parameters from the statistical estimator using a higher fraction of non-detects  
392 compared to the reference scenario. Approach referred to as A2.

| Method  | D <sub>L</sub><br>[kg h <sup>-1</sup> ] | S <sub>r</sub> | S <sub>o</sub> [% of non-<br>detects] | μ     | σ    | EF<br>[kg h <sup>-1</sup> site <sup>-1</sup> ] | 95 % CI |
|---------|-----------------------------------------|----------------|---------------------------------------|-------|------|------------------------------------------------|---------|
| OTM-33A | 0.11                                    | 53             | 29 [35 %]                             | -0.85 | 2.38 | 7.3                                            | 2.2–30  |
| GPM     | 0.11                                    | 57             | 31 [35 %]                             | -1.00 | 2.70 | 14                                             | 3.4–74  |
| TDM     | 0.07                                    | 21             | 8 [27 %]                              | -0.97 | 2.46 | 7.9                                            | 1.2–85  |
| MBA     | 0.11                                    | 31             | 17 [35 %]                             | -1.07 | 2.17 | 3.7                                            | 1.0–17  |
| TOTAL   | -                                       | -              | -                                     | -0.98 | 2.49 | 8.3                                            | 3.8–19  |

393 D<sub>L</sub> is the detection limit of each measurement method, S<sub>r</sub> is the number of measurements above the  
394 detection limit, S<sub>o</sub> is the number of measurements at or below the detection limit (included as censored  
395 data), EF is the emission factor estimated as  $EF = e^{\mu + \frac{1}{2}\sigma^2}$ , TOTAL presents the results of the statistical  
396 estimator considering all four measurement methods.

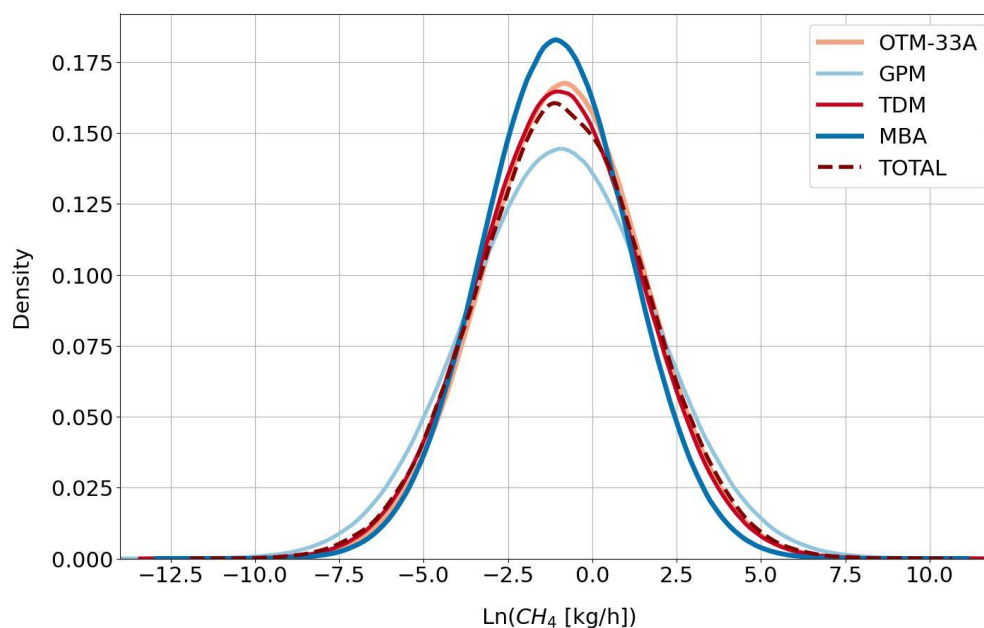

397

398 Figure S4. Fitted pdfs of the statistical estimator for each measurement method using a higher fraction of  
 399 non-detects compared to the reference scenario.

400 Table S10 and Fig. S5 provide an overview of the different statistical upscaling approaches that  
 401 have been performed to evaluate the ROMEO oil production site measurements. All estimates  
 402 agree within the 95 % confidence intervals. Even the lower ends of all individual approaches for  
 403 oil production sites in the Southern part of Romania from one operator only (still the biggest  
 404 operator) lead to estimates of the annual emission rate that are larger than the emissions  
 405 reported by Romania to the UNFCCC for all emissions from oil and gas production, see main text.

406 Table S10. Different upscaling approaches used to determine the total CH<sub>4</sub> basin emission factors for the  
 407 ROMEO study.

| Approach              | Description                          | EF [kg h <sup>-1</sup> site <sup>-1</sup> ] | 95 % CI |
|-----------------------|--------------------------------------|---------------------------------------------|---------|
| A1 (Ref) <sup>a</sup> | Reference scenario                   | 5.4                                         | 3.6–8.4 |
| A2 <sup>a</sup>       | Higher # of non-detects              | 8.3                                         | 3.8–19  |
| A3 <sup>b</sup>       | Per method & different # non detects | 9.6                                         | 7.0–14  |
| A4 <sup>c</sup>       | Per region & different # non-detects | 9.9                                         | 7.2–14  |
| A2 <sup>b</sup>       | Per method & no non-detects          | 7.8                                         | 6.2–10  |
| A6 <sup>c</sup>       | Per region & no non-detects          | 7.3                                         | 5.9–9.1 |

408 <sup>a</sup>Overall EFs calculated using the statistical estimator, see S4

409 <sup>b</sup>Overall EFs calculated by statistically combining the EFs from four methods, see S7

410 <sup>c</sup>Overall EFs calculated by statistically combining the EFs from two regions, see S7

411

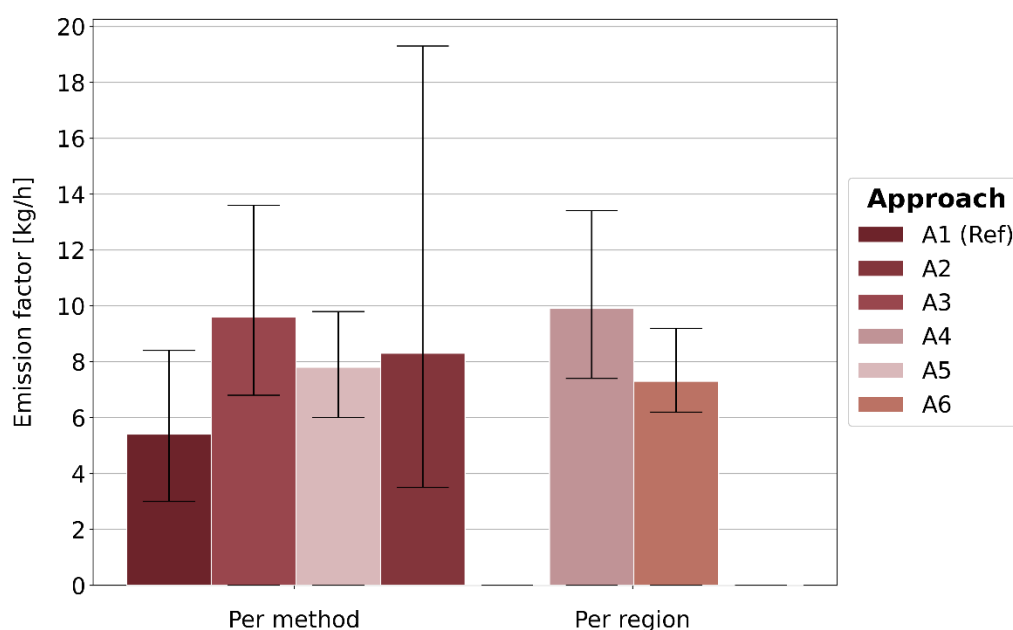

412 Figure S5. Overview of the CH<sub>4</sub> emission factor calculated from the ROMEO quantifications using the  
 413 different statistical approaches described above. The error bars represent the 95 % CI of estimated  
 414 emission factors. The numerical values are reported in Table S9. The approaches differ mainly in the  
 415 fraction of sites BDL added to the evaluation and the DL of each method. Approaches A5 and A6 do not  
 416 include any non-detects, but a separate mode of non-emitters.  
 417

### 418 S8. Sensitivity analysis of the statistical estimator

419 The results of the statistical estimator depend strongly on two parameters, the detection limit  
 420 of the measurement method and the number of sites below this detection limit, i.e., the non-  
 421 detects. We tested the sensitivity of the lognormal fits by running the statistical estimator for  
 422 three different values for both the detection limit and the fraction of non-detects. We use the  
 423 subset of oil production sites from the OTM-33A method for the sensitivity analysis. Table S11  
 424 provides the summary of the parameters and Fig. S6 presents the fitted pdfs derived from the  
 425 statistical estimator. By decreasing the value of the detection limit or by increasing the fraction  
 426 of non-detects, the estimated EFs increase, due to the widening of the distribution towards the  
 427 lower end. This behaviour is more prominent and results in very large EF estimates when the  
 428 detection limit is very low. The choice of the detection limit does not affect the high end of the  
 429 distribution substantially, and the choice of the percentage of non-detects has an even smaller  
 430 impact. These findings underscore the sensitivity of the statistical estimator to the low end of the  
 431 distribution and highlight the need for thorough investigation when choosing the values of these  
 432 two parameters.

433

434



435 Table S11. Summary of parameters from the statistical estimator calculated using different values for the  
 436 detection limit and for the fraction of non-detects.

| Parameter        | DL [kg h <sup>-1</sup> ] | S <sub>r</sub> | S <sub>o</sub> [%] | μ     | σ    | EF [kg h <sup>-1</sup> site <sup>-1</sup> ] | 95 % CI   |
|------------------|--------------------------|----------------|--------------------|-------|------|---------------------------------------------|-----------|
| Detection limit  | 0.036                    | 54             | 29 [35%]           | -1.39 | 3.06 | 27.2                                        | 4.4 – 235 |
|                  | 0.11                     | 53             | 29 [35%]           | -0.85 | 2.38 | 7.3                                         | 2.2 – 30  |
|                  | 0.2                      | 52             | 28 [35%]           | -0.52 | 2.01 | 4.5                                         | 1.8 – 13  |
| % of non-detects | 0.11                     | 53             | 18 [25%]           | -0.31 | 2.03 | 5.7                                         | 2.3 – 16  |
|                  | 0.11                     | 53             | 29 [35%]           | -0.85 | 2.38 | 7.3                                         | 2.2 – 30  |
|                  | 0.11                     | 53             | 43 [45%]           | -1.47 | 2.73 | 9.7                                         | 2.1 – 57  |

437 DL is the detection limit of each measurement method, S<sub>r</sub> is the number of measurements above the DL, S<sub>o</sub>  
 438 is the number of measurements at or below the DL (included as censored data), EF is the emission factor  
 439 estimated as  $EF = e^{\mu + \frac{1}{2}\sigma^2}$

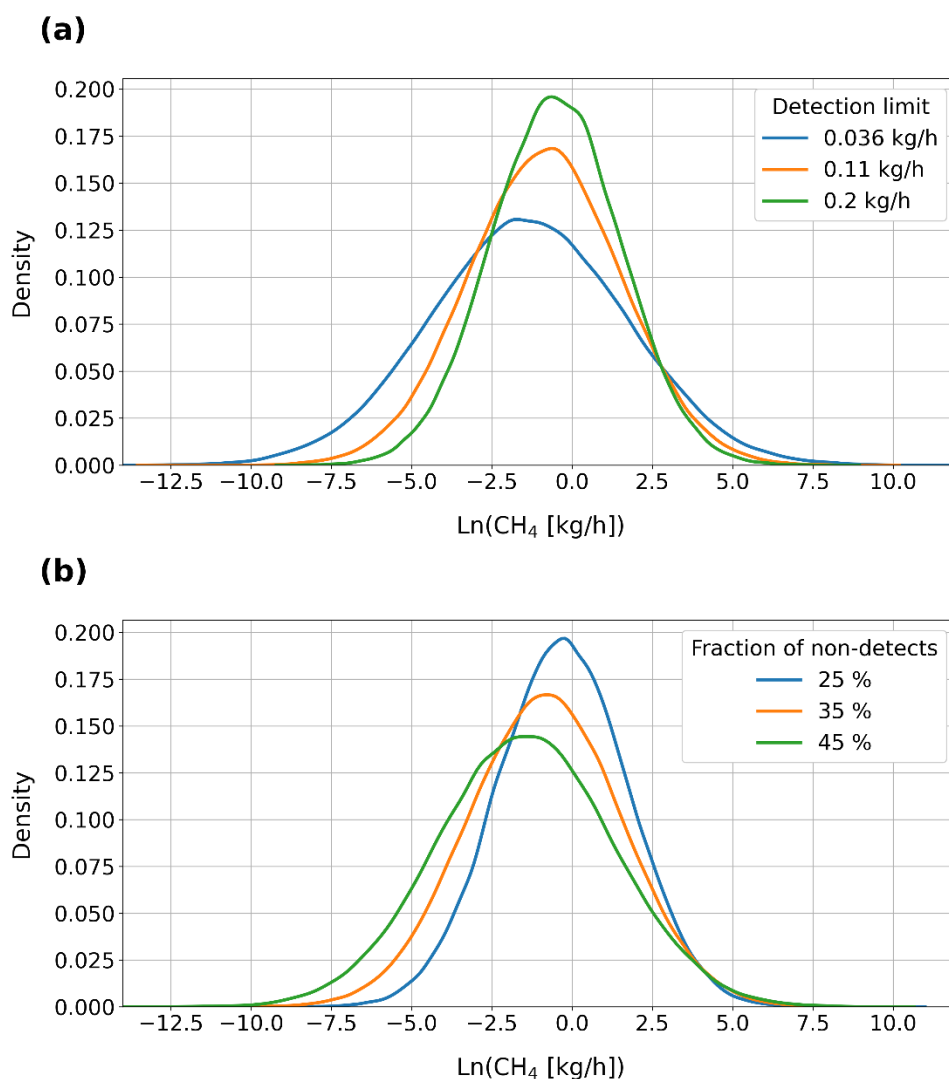

441 Figure S6. Probability density functions derived from the statistical estimator calculated using different  
442 values for the detection limit (top) and number of non-detects (bottom).

443 **S9. Histograms and fitted pdfs under the statistical estimator for each**  
444 **measurement method used**

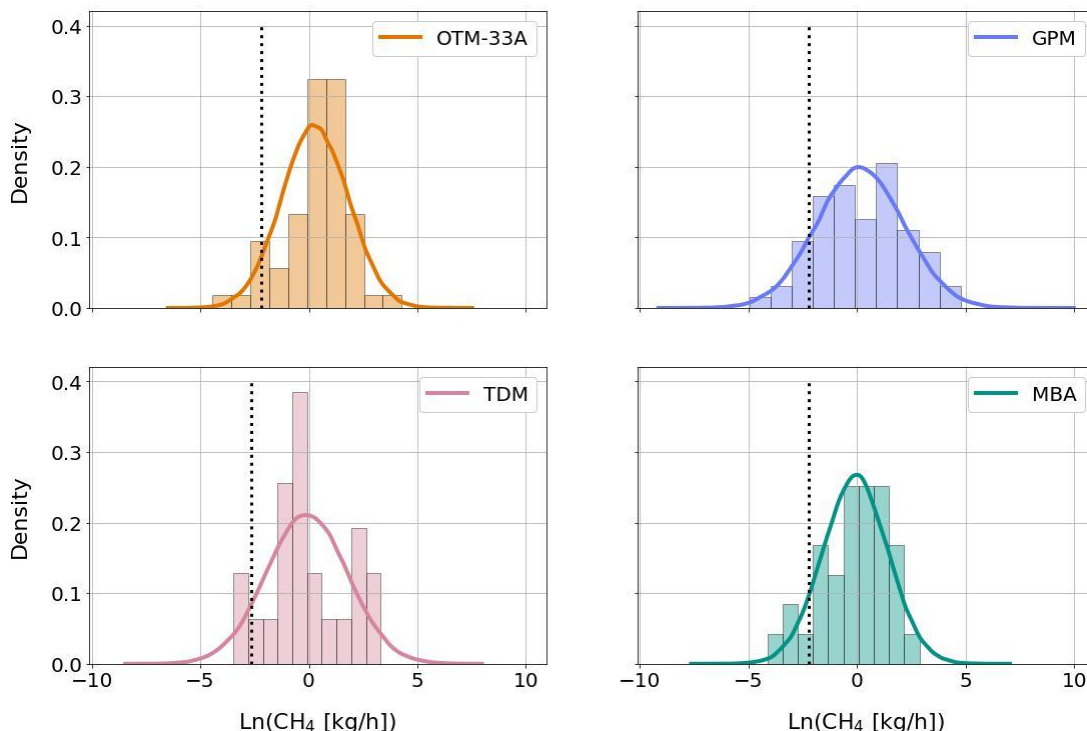

445  
446 Figure S7. Histograms and fitted pdfs under the statistical estimator for each measurement method used  
447 for the reference scenario. Vertical lines indicate the detection limit of each method. Values below these  
448 detection limits are the censored data chosen randomly between 0 kg h<sup>-1</sup> and each method's detection  
449 limit and added to the lower end of the distributions to include the non-detects as described in sections  
450 S4 and S5.

451

452 **S10. Semi-quantitative evaluation of screening data**

453 A simplified Gaussian plume algorithm was applied to the screening data from all vehicles to  
454 locate the sources and determine normalized CH<sub>4</sub> enhancements. When a CH<sub>4</sub> enhancement was  
455 detected, the algorithm looked for registered O&G production sites within a radius of 100 m from  
456 the maximum CH<sub>4</sub> mole fraction observed and assigned the emission to this particular site.  
457 Gaussian peaks were fitted to the observed data and scaled to 1 m width by conserving the shape  
458 of the Gaussian function. This was done because sites were screened from a variety of distances  
459 and the maximum signal is not representative for the actual emissions. Scaling the peaks to a  
460 common width, which effectively means common distance if the meteorological conditions are  
461 similar, allowed to compare normalized CH<sub>4</sub> enhancements of all plumes. Histograms of the  
462 normalized CH<sub>4</sub> enhancements from each vehicle performing the screenings and the combination  
463 of their datasets are shown in Fig. S8.

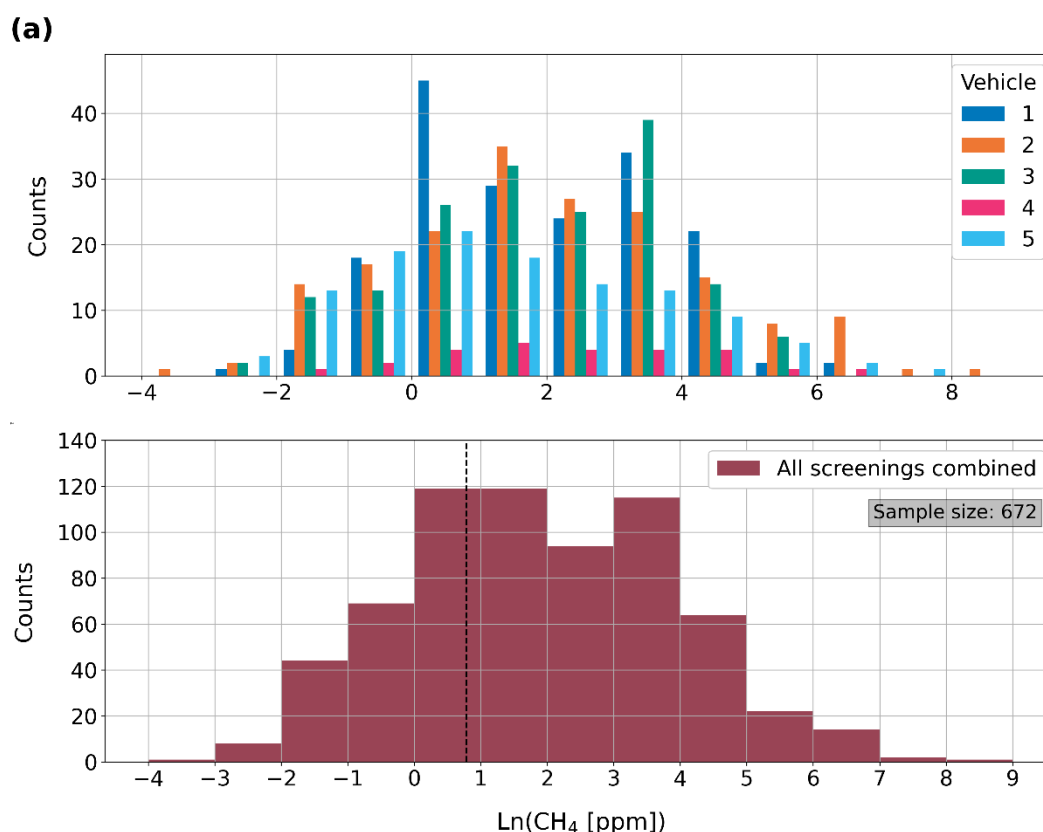

464  
 465 Figure S8. Frequency distribution of normalized CH<sub>4</sub> enhancements for oil production sites from a)  
 466 different screening vehicles, b) the combination of datasets from the five screenings vehicles. The black  
 467 dashed vertical line in the lower graph indicates the detection limit of 2.2 ppm used for the OTM-33A  
 468 dataset.  
 469

470 Table S12 shows the number of successfully normalized CH<sub>4</sub> enhancements from the  
 471 screening, and parameters  $\mu$  and  $\sigma$  derived from the statistical estimator using the normalized  
 472 CH<sub>4</sub> enhancements from each vehicle performing the screenings and the combination of their  
 473 datasets. When we fit the screening datasets to lognormal distributions, the estimated values  
 474 for the width of the distributions,  $\sigma$ , range between 1.8 and 2.3 in logarithmic scale, with a total  
 475 value of 2.0. Here, we assume that the emissions distribution for the screenings is complete,  
 476 i.e., we do not add measurements below the detection limit. For the quantifications using the  
 477 Reference scenario and including a small fraction of 9-12 % of non-detects to the distributions,  
 478 the values for the parameter  $\sigma$  range between 1.5 and 2.0, with a total value of 1.8. We find that  
 479 the estimates for the width of the distributions converge with the quantifications showing  
 480 slightly narrower distributions compared to the screenings. However, we note that the  
 481 estimated parameters under the statistical estimator may not accurately characterize the  
 482 screening distributions since not all screening datasets passed the statistical tests for  
 483 lognormality (see S3). Another reason for this small discrepancy could be the effect of the  
 484 fraction of non-detects to the width of the distribution. As discussed in Section S8, the width of  
 485 the lognormal fit depends on the choice of the fraction of non-detects and the detection limit.  
 486

487 Table S12. Overview of the number of normalized CH<sub>4</sub> enhancements, and parameters  $\mu$  and  $\sigma$  derived  
 488 from the statistical estimator using the normalized CH<sub>4</sub> enhancements per vehicle used for the  
 489 screenings.

| Vehicle <sup>a</sup> | # of Normalized CH <sub>4</sub> Enhancements | $\mu$ | $\sigma$ |
|----------------------|----------------------------------------------|-------|----------|
| 1                    | 181                                          | 2.0   | 1.8      |
| 2                    | 26                                           | 2.3   | 1.9      |
| 3                    | 177                                          | 2.1   | 2.3      |
| 4                    | 169                                          | 1.9   | 1.8      |
| 5                    | 119                                          | 1.4   | 2.2      |
| Total                | 672                                          | 1.9   | 2.0      |

<sup>a</sup>Screenings were performed using five different cars and results were separated into five different datasets.

490  
491  
492  
493  
494

### S11. Component scale measurements

495 Optical Gas Imaging (OGI, (Lyman et al., 2019)) was used to locate CH<sub>4</sub> sources on the  
496 component scale. After the detection and location of leaks with OGI, CH<sub>4</sub> emissions from  
497 accessible leaks were measured with a Hi-Flow Sampler (HFS, (Bacharach, 2015)). The HFS is a  
498 portable, battery-operated instrument used to determine the rate of gas leakage from individual  
499 components in the O&G infrastructure. The component is enclosed in a bag and the gas emitted  
500 from the component as well as a certain amount of surrounding air is pumped at high flow rate  
501 to a CH<sub>4</sub> analyzer. The gas leak rate of the component can then be calculated using the flow rate  
502 of the sampling stream and the gas mole fraction within that stream.

503 A total of 231 individual leaks were identified with the OGI camera. Because of limited site  
504 access, the emission rates of only 62 leaking components were measured using the HFS method.  
505 The majority of those, namely 33 leaks, were from two screened gas compressor stations with  
506 high number of emission points (see main text) and their emission rates ranged between 0.02 kg  
507 h<sup>-1</sup> to 1.6 kg h<sup>-1</sup> per leak. From oil production sites, we could only measure leak rates from 14  
508 components using the HFS method, yielding emission rate estimates between 0.1 and 6.5 kg h<sup>-1</sup>  
509 per leak. We note that a site can have several leaking components, which may not all be  
510 quantified, resulting in an underestimate of site-level emissions when only the quantified  
511 components are considered.

512  
513

Tab. S13. Overview of the sites screened with infrared camera.

| Site Description              | # of emitting sites | # of emitting sites | # of identified leaks | # of quantified leaks | Range of CH <sub>4</sub> emission rates [kg h <sup>-1</sup> leak <sup>-1</sup> ] |
|-------------------------------|---------------------|---------------------|-----------------------|-----------------------|----------------------------------------------------------------------------------|
| Oil production sites          | 155                 | 74                  | 86                    | 14                    | 0.09 - 6.5                                                                       |
| Gas production sites          | 6                   | 3                   | 3                     | 3                     | 0.07 - 0.2                                                                       |
| Oil parks                     | 5                   | 5                   | 28                    | 7                     | 0.21 - 6.5                                                                       |
| Gas compressor stations       | 2                   | 2                   | 85                    | 33                    | 0.02 - 1.6                                                                       |
| Other Facilities <sup>a</sup> | 13                  | 6                   | 30                    | 5                     | 0.14 - 0.6                                                                       |
| Total                         | 181                 | 89                  | 231                   | 62                    | 0.07 - 6.5                                                                       |

514 <sup>a</sup> "Other facilities" include oil production batteries, disposal injection wells, oil deposits, random  
 515 locations and sites mentioned as "other facilities" in the data provided by the O&G production  
 516 operators.

517

518 **S12. Comparison with CH<sub>4</sub> emissions reported from other studies**

519 Table S14. Summary of estimated parameters derived from the statistical estimator  
 520 for each of the production regions used in our comparison.

| Dataset                               | $\mu$ | $\sigma$ | EF [kg h <sup>-1</sup><br>site <sup>-1</sup> ] | Gini<br>coefficient <sup>a</sup> | Reference                   |
|---------------------------------------|-------|----------|------------------------------------------------|----------------------------------|-----------------------------|
| Denver - Julesburg<br>(Colorado, US)  | -0.62 | 1.3      | 1.2                                            | 0.63                             | Robertson et al. (2017)     |
| Barnett Shale<br>(Texas, US)          | -1.8  | 2.2      | 1.8                                            | 0.88                             | Zavala-Araiza et al. (2015) |
| Red Deer (Alberta,<br>Canada)         | -0.31 | 1.5      | 2.2                                            | 0.70                             | Zavala-Araiza et al. (2018) |
| Upper Green River<br>(US)             | 0.32  | 1.0      | 2.4                                            | 0.53                             | Robertson et al. (2017)     |
| Fayetteville<br>(Arkansas, US)        | -2.1  | 2.5      | 2.5                                            | 0.92                             | Robertson et al. (2017)     |
| Uintah (Wyoming,<br>US)               | 0.17  | 1.3      | 2.7                                            | 0.63                             | Robertson et al. (2017)     |
| <b>Romania (Europe)</b>               | 0.12  | 1.8      | 5.4                                            | 0.79                             | This study                  |
| Marcellus (US)                        | 0.39  | 1.8      | 7.3                                            | 0.79                             | Omara et al. (2016)         |
| Permian (Texas, New<br>Mexico, US)    | 1.5   | 1.1      | 8.2                                            | 0.56                             | Robertson et al. (2020)     |
| Compressor stations<br>(national, US) | 3.1   | 1.5      | 64                                             | 0.71                             | Zavala-Araiza et al. (2015) |
| Processing plants<br>(national US)    | 4.4   | 1.3      | 190                                            | 0.64                             | Zavala-Araiza et al. (2015) |

521 <sup>a</sup>The Gini coefficient is a measure of statistical dispersion used to estimate the inequality among values of  
 522 a frequency distribution. A Gini coefficient of 0 represents complete equality, whereas a Gini coefficient  
 523 close to one expresses the maximum inequality among values where a few sites have a highly  
 524 disproportionate contribution to total emissions.

525

526 **S13. Production and age characteristics of surveyed oil production sites**

527 To assess how representative the measured oil production sites were in comparison to the  
 528 characteristics of the total population of oil production sites in Romania and to determine  
 529 possible differences between the characteristics of oil production sites measured with different  
 530 quantification methods, we investigated the relation of emission rate with age, oil and gas  
 531 production provided by the operator. Note that the data provided by the operator regarding oil  
 532 and gas production solely refers to the three-week duration of the measurement campaign and  
 533 does not cover the entire year. For the majority of oil production sites visited, the operator  
 534 reported zero gas production or no gas production for the duration of the measurement

535 campaign in 2019. For the oil production sites which report a non-zero value for gas production,  
 536 we calculate the average gas production per site. We use the reported spud dates from the  
 537 operators to determine the number of years that a particular equipment has been in operation.  
 538 This analysis was performed for both the component and the facility scale measurements.

539 A summary of the characteristics for the measured oil production sites and for the total  
 540 population of oil production sites in Romania is shown in Table S14. The distribution for average  
 541 site age shows little variability across the different methods, between 28 years for the sites  
 542 quantified with OTM-33A and 34 years for TDM. The average age of the complete population is  
 543 37 years, so the sites targeted during ROMEEO were slightly younger than the average age of the  
 544 total population.

545 The diversity of the sampled oil production sites is more prominent in terms of production  
 546 characteristics, and higher than the total population average of 32 tons. Among all measurement  
 547 methods, TDM sites had the lowest average oil production of 43 tons, followed closely by MBA  
 548 with 47 tons. GPM had the highest production of 77 tons of oil, more than double the country  
 549 average value. For the gas production, around 50 % of the sampled oil production sites with OTM-  
 550 33A, GPM and MBA report zero gas production or had no gas production in 2019, for the TDM  
 551 this value is 60 %. These percentages are comparable to the 52 % of the total population of oil  
 552 production sites in Romania. For the sites which report a non-zero value for gas production, TDM  
 553 was deployed at sites with the highest average production of around 106,000 scm of natural gas,  
 554 whereas for GPM it was 12,000 scm. The total population average is 27,400 scm. In summary, oil  
 555 production sites sampled during ROMEEO have higher oil production than the total population. In  
 556 terms of gas production, OTM-33A measurements were representative of the total population of  
 557 oil production sites. TDM and MBA leaned towards the high, whereas GPM towards the low end  
 558 of the spectrum.

559 Table S14. Summary of characteristics (average production and age) from sampled oil production sites  
 560 based on the measurement method used, and from the total population of oil production sites in  
 561 Romania. The values related to oil and gas production refer to the production that occurred during the  
 562 three-week duration of the measurement campaign.

| Characteristics                  | OTM-33A | GPM | TDM | MBA | Total population |
|----------------------------------|---------|-----|-----|-----|------------------|
| Age [years]                      | 28      | 29  | 34  | 30  | 37               |
| Gas production [ $10^3$ scm]     | 26      | 12  | 106 | 49  | 27               |
| Zero gas production [% of sites] | 49      | 51  | 60  | 53  | 52               |
| Oil production [tons]            | 61      | 77  | 43  | 47  | 32               |

563 Similarly, a summary of the characteristics from the IR screened oil production sites and from  
 564 the total population of oil production sites in Romania is shown in Table S15. We find that  
 565 emitting oil production sites have a slightly higher gas production and a lower fraction of wells  
 566 reporting zero gas production compared to non-emitting oil production sites. For the gas  
 567 production, approximately 70 % of emitting and 82 % of non-emitting oil production sites visited  
 568 report zero gas production or had no gas production in 2019. These percentages are higher than  
 569 the average percentage of the total population of oil production sites in the country. Emitting oil  
 570 production sites had an average age of 36 years, average gas production of 9,500 scm per and  
 571 average oil production of 48 tons. We found a slightly lower range of values for non-emitting oil  
 572 production sites (see Table S15). Overall, the sites visited were representative of the total  
 573

574 population of sites in the country in terms of age. However, measurements leaned more towards  
 575 the high oil, but very low gas producing end of the spectrum.

576 Table S15. Summary of characteristics (average production and age) from screened oil production sites  
 577 and from the total population of oil production sites in Romania. The values related to oil and gas  
 578 production refer to the production that occurred during the three-week duration of the measurement  
 579 campaign.

| Characteristics                  | Emitting oil production sites | Non-emitting oil production sites | Total population |
|----------------------------------|-------------------------------|-----------------------------------|------------------|
| Age [years]                      | 36                            | 37                                | 37               |
| Gas production [ $10^3$ scm]     | 9.5                           | 7.5                               | 27               |
| Zero gas production [% of sites] | 70                            | 82                                | 52               |
| Oil production [tons]            | 48                            | 52                                | 32               |

580

581

582

### S14. Complete quantified emissions dataset

583

Table S16. Emission dataset used in this study

| N  | Method | Site ID  | Region | Site Description | CH <sub>4</sub> emissions [kg h <sup>-1</sup> ] |
|----|--------|----------|--------|------------------|-------------------------------------------------|
| 1  | TDM    | 58       | C7     | Facility         | 106.767                                         |
| 2  | TDM    | 7        | C8     | Gas well         | 90.439                                          |
| 3  | TDM    | 1        | C6     | Gas well         | 66.806                                          |
| 4  | TDM    | 16       | C6     | Oil well         | 27.286                                          |
| 5  | TDM    | 45       | C6     | Facility         | 25.025                                          |
| 6  | TDM    | 67       | C5A    | Facility         | 22.518                                          |
| 7  | TDM    | 59       | C7     | Oil well         | 20.071                                          |
| 8  | TDM    | 12       | C7     | Gas manifold     | 18.732                                          |
| 9  | TDM    | 48       | C7     | Oil park         | 13.030                                          |
| 10 | TDM    | 15       | C6     | Oil well         | 11.559                                          |
| 11 | TDM    | 47       | C7     | Facility         | 10.692                                          |
| 12 | TDM    | 54       | C7     | Facility         | 9.990                                           |
| 13 | TDM    | 18       | C7     | Oil well         | 9.537                                           |
| 14 | TDM    | 70       | C5A    | Facility         | 8.345                                           |
| 15 | TDM    | 11       | C8     | Facility         | 8.313                                           |
| 16 | TDM    | 9        | C8     | Gas manifold     | 7.500                                           |
| 17 | TDM    | 13       | C7     | Oil park         | 7.118                                           |
| 18 | TDM    | 68       | C5A    | Oil park         | 6.442                                           |
| 19 | TDM    | 17       | C7     | Oil well         | 6.440                                           |
| 20 | TDM    | 66       | C6     | Oil park         | 6.111                                           |
| 21 | TDM    | 74       | C5A    | Facility         | 5.028                                           |
| 22 | TDM    | 5        | C8     | Gas manifold     | 4.431                                           |
| 23 | TDM    | 44       | C6     | Oil park         | 3.983                                           |
| 24 | TDM    | 51/52/53 | C7     | Oil well         | 8.275*                                          |
| 25 | TDM    | 2        | C6     | Oil well         | 2.580                                           |
| 26 | TDM    | 33       | C5A    | Oil well         | 1.463                                           |

|    |         |     |     |              |        |
|----|---------|-----|-----|--------------|--------|
| 27 | TDM     | 10  | C8  | Gas well     | 1.322  |
| 28 | TDM     | 14  | C7  | Oil well     | 1.281  |
| 29 | TDM     | 69  | C5A | Facility     | 0.833  |
| 30 | TDM     | 32  | C5A | Oil well     | 0.816  |
| 31 | TDM     | 38  | C5A | Oil well     | 0.778  |
| 32 | TDM     | 6   | C8  | Gas well     | 0.616  |
| 33 | TDM     | 31  | C5A | Oil well     | 0.568  |
| 34 | TDM     | 36  | C5A | Oil well     | 0.542  |
| 35 | TDM     | 37  | C5A | Oil well     | 0.495  |
| 36 | TDM     | 65  | C6  | Oil well     | 0.488  |
| 37 | TDM     | 42  | C7  | Oil well     | 0.443  |
| 38 | TDM     | 62  | C7  | Oil well     | 0.324  |
| 39 | TDM     | 43  | C7  | Oil well     | 0.289  |
| 40 | TDM     | 4   | C8  | Oil well     | 0.245  |
| 41 | TDM     | 46  | C6  | Oil park     | 0.192  |
| 42 | TDM     | 8   | C8  | Gas well     | 0.149  |
| 43 | TDM     | 60  | C7  | Facility     | 0.142  |
| 44 | TDM     | 3   | C7  | Oil well     | 0.134  |
| 45 | TDM     | 55  | C7  | Oil well     | 0.118  |
| 46 | TDM     | 41  | C7  | Gas well     | 0.075  |
| 47 | TDM     | 49  | C7  | Oil well     | 0.035  |
| 48 | TDM     | 40  | C5A | Oil well     | 0.009  |
| 49 | TDM     | 39  | C5A | Oil well     | 0.006  |
| 50 | TDM     | 75  | C7  | Oil well     | 0.001  |
| 51 | OTM-33A | 258 | 4   | Oil well     | 72.612 |
| 52 | OTM-33A | 279 | 8   | Oil park     | 33.660 |
| 53 | OTM-33A | 226 | 4   | Oil well     | 18.432 |
| 54 | OTM-33A | 239 | 6   | Gas well     | 15.408 |
| 55 | OTM-33A | 263 | 6   | Gas well     | 14.652 |
| 56 | OTM-33A | 250 | 5A  | Oil facility | 12.852 |
| 57 | OTM-33A | 251 | 5A  | Oil park     | 12.708 |
| 58 | OTM-33A | 274 | 5A  | Oil facility | 11.376 |
| 59 | OTM-33A | 286 | 6   | Oil well     | 7.668  |
| 60 | OTM-33A | 272 | 4   | Oil well     | 6.984  |
| 61 | OTM-33A | 224 | 5A  | Oil well     | 6.588  |
| 62 | OTM-33A | 277 | 8   | Unknown      | 6.444  |
| 63 | OTM-33A | 234 | 7   | Oil well     | 6.264  |
| 64 | OTM-33A | 281 | 6   | Oil well     | 6.084  |
| 65 | OTM-33A | 235 | 2   | Oil well     | 5.544  |
| 66 | OTM-33A | 241 | 5A  | Oil well     | 5.256  |
| 67 | OTM-33A | 222 | 2   | Oil well     | 5.112  |
| 68 | OTM-33A | 273 | 5A  | Oil facility | 4.932  |
| 69 | OTM-33A | 280 | 8   | Unknown      | 4.788  |
| 70 | OTM-33A | 232 | 5A  | Oil well     | 4.680  |
| 71 | OTM-33A | 240 | 5A  | Oil well     | 4.608  |
| 72 | OTM-33A | 285 | 6   | Oil well     | 4.392  |
| 73 | OTM-33A | 238 | 5A  | Oil well     | 4.140  |
| 74 | OTM-33A | 227 | 4   | Oil well     | 4.068  |



|     |         |     |    |          |       |
|-----|---------|-----|----|----------|-------|
| 75  | OTM-33A | 248 | 2  | Oil well | 3.564 |
| 76  | OTM-33A | 295 | 6  | Oil well | 3.564 |
| 77  | OTM-33A | 266 | 5A | Oil well | 3.168 |
| 78  | OTM-33A | 249 | 5A | Oil well | 3.132 |
| 79  | OTM-33A | 291 | 7  | Oil well | 3.024 |
| 80  | OTM-33A | 231 | 4  | Oil well | 2.808 |
| 81  | OTM-33A | 267 | 4  | Oil well | 2.736 |
| 82  | OTM-33A | 289 | 6  | Oil well | 2.736 |
| 83  | OTM-33A | 228 | 4  | Oil well | 2.664 |
| 84  | OTM-33A | 265 | 5A | Oil well | 2.520 |
| 85  | OTM-33A | 229 | 5A | Oil well | 2.412 |
| 86  | OTM-33A | 223 | 5A | Oil well | 1.980 |
| 87  | OTM-33A | 247 | 5A | Oil well | 1.728 |
| 88  | OTM-33A | 252 | 7  | Gas well | 1.728 |
| 89  | OTM-33A | 293 | 6  | Oil well | 1.692 |
| 90  | OTM-33A | 287 | 6  | Oil well | 1.512 |
| 91  | OTM-33A | 288 | 6  | Oil well | 1.512 |
| 92  | OTM-33A | 242 | 2  | Oil well | 1.476 |
| 93  | OTM-33A | 225 | 4  | Oil well | 1.440 |
| 94  | OTM-33A | 259 | 4  | Oil well | 1.368 |
| 95  | OTM-33A | 256 | 4  | Oil well | 1.332 |
| 96  | OTM-33A | 268 | 5A | Oil well | 1.260 |
| 97  | OTM-33A | 233 | 5A | Oil well | 1.188 |
| 98  | OTM-33A | 294 | 6  | Oil well | 1.188 |
| 99  | OTM-33A | 255 | 5A | Oil well | 1.044 |
| 100 | OTM-33A | 269 | 5A | Oil well | 1.044 |
| 101 | OTM-33A | 284 | 7  | Oil well | 1.044 |
| 102 | OTM-33A | 221 | 2  | Gas well | 1.008 |
| 103 | OTM-33A | 253 | 5A | Oil well | 0.972 |
| 104 | OTM-33A | 264 | 4  | Oil well | 0.972 |
| 105 | OTM-33A | 296 | 6  | Oil park | 0.936 |
| 106 | OTM-33A | 246 | 2  | Oil well | 0.828 |
| 107 | OTM-33A | 290 | 6  | Unknown  | 0.828 |
| 108 | OTM-33A | 270 | 4  | Oil well | 0.792 |
| 109 | OTM-33A | 236 | 6  | Gas well | 0.612 |
| 110 | OTM-33A | 261 | 4  | Oil well | 0.540 |
| 111 | OTM-33A | 244 | 2  | Gas well | 0.504 |
| 112 | OTM-33A | 262 | 5A | Oil well | 0.504 |
| 113 | OTM-33A | 276 | 8  | Unknown  | 0.504 |
| 114 | OTM-33A | 230 | 2  | Gas well | 0.432 |
| 115 | OTM-33A | 260 | 5A | Oil well | 0.432 |
| 116 | OTM-33A | 282 | 6  | Oil well | 0.432 |
| 117 | OTM-33A | 297 | 6  | Oil well | 0.396 |
| 118 | OTM-33A | 275 | 6  | Oil well | 0.360 |
| 119 | OTM-33A | 245 | 2  | Gas well | 0.324 |
| 120 | OTM-33A | 271 | 5A | Oil well | 0.324 |
| 121 | OTM-33A | 283 | 7  | Unknown  | 0.252 |
| 122 | OTM-33A | 243 | 2  | Gas well | 0.180 |

|     |          |          |     |                |          |
|-----|----------|----------|-----|----------------|----------|
| 123 | OTM-33A  | 254      | 5A  | Oil well       | 0.180    |
| 124 | OTM-33A  | 278      | 8   | Gas well       | 0.180    |
| 125 | OTM-33A  | 292      | 7   | Unknown        | 0.180    |
| 126 | OTM-33A  | 237      | 2   | Gas well       | 0.108    |
| 127 | OTM-33A  | 257      | 4   | Oil well       | 0.108    |
| 128 | GPM      | 50       | C7  | Oil park       | 138.513  |
| 129 | GPM      | 217      | 7   | Oil deposit    | 93.060   |
| 130 | GPM      | 64       | C6  | Facility       | 63.771   |
| 131 | GPM      | 71       | C5A | Oil well       | 46.069   |
| 132 | GPM      | 24/25/26 | C6  | Oil well       | 118.079* |
| 133 | GPM      | 56       | C7  | Facility       | 36.660   |
| 134 | GPM      | 212      | 4   | Other facility | 31.176   |
| 135 | GPM      | 21       | C7  | Oil well       | 26.487   |
| 136 | GPM      | 201      | 4   | Oil well       | 25.920   |
| 137 | GPM      | 23       | C6  | Oil well       | 22.722   |
| 138 | GPM      | 220      | 5A  | Unknown        | 14.904   |
| 139 | GPM      | 57       | C7  | Facility       | 14.655   |
| 140 | GPM      | 202      | 7   | Oil well       | 14.220   |
| 141 | GPM      | 219      | 5A  | Gas compressor | 12.996   |
| 142 | GPM      | 22       | C6  | Oil well       | 12.522   |
| 143 | GPM      | 211      | 5A  | Oil park       | 11.952   |
| 144 | GPM      | 20       | C7  | Oil well       | 10.233   |
| 145 | GPM      | 72       | C5A | Facility       | 9.175    |
| 146 | GPM      | 19       | C7  | Oil well       | 6.649    |
| 147 | GPM      | 205      | 7   | Oil well       | 6.444    |
| 148 | GPM      | 61       | C7  | Facility       | 6.202    |
| 149 | GPM      | 73       | C5A | Facility       | 5.848    |
| 150 | GPM      | 213      | 5A  | Oil deposit    | 5.688    |
| 151 | GPM      | 28       | C6  | Oil well       | 4.970    |
| 152 | GPM      | 27       | C6  | Oil well       | 4.416    |
| 153 | GPM      | 63       | 0   | Facility       | 3.812    |
| 154 | GPM      | 30       | C6  | Oil well       | 3.705    |
| 155 | GPM      | 214      | 5A  | Gas compressor | 3.204    |
| 156 | GPM      | 216      | 7   | Oil deposit    | 2.484    |
| 157 | GPM      | 203      | 4   | Oil well       | 2.448    |
| 158 | GPM      | 215      | 6   | Oil park       | 1.872    |
| 159 | GPM      | 218      | 7   | Oil park       | 1.656    |
| 160 | GPM      | 206      | 6   | Gas well       | 1.476    |
| 161 | GPM      | 29       | C6  | Oil well       | 0.956    |
| 162 | GPM      | 34       | C5A | Oil well       | 0.731    |
| 163 | GPM      | 209      | 7   | Oil well       | 0.684    |
| 164 | GPM      | 210      | 7   | Oil well       | 0.648    |
| 165 | GPM      | 208      | 7   | Oil well       | 0.576    |
| 166 | GPM      | 204      | 4   | Oil well       | 0.540    |
| 167 | GPM      | 207      | 4   | Oil well       | 0.288    |
| 168 | GPM      | 35       | C5A | Oil well       | 0.034    |
| 169 | Estimate | 97       | C6  | Gas well       | 61.228   |
| 170 | Estimate | 81       | C8  | Gas well       | 33.910   |

|     |          |     |    |          |        |
|-----|----------|-----|----|----------|--------|
| 171 | Estimate | 98  | C6 | Gas well | 31.889 |
| 172 | Estimate | 86  | C8 | Oil well | 22.946 |
| 173 | Estimate | 91  | C7 | Oil well | 19.967 |
| 174 | Estimate | 89  | C8 | Gas well | 15.297 |
| 175 | Estimate | 140 | C7 | Oil well | 7.957  |
| 176 | Estimate | 136 | C7 | Oil well | 6.879  |
| 177 | Estimate | 159 | C6 | Facility | 5.348  |
| 178 | Estimate | 173 | C6 | Oil well | 5.159  |
| 179 | Estimate | 78  | C7 | Oil well | 4.761  |
| 180 | Estimate | 137 | C7 | Facility | 4.332  |
| 181 | Estimate | 155 | C6 | Oil well | 4.100  |
| 182 | Estimate | 149 | C6 | Oil well | 4.041  |
| 183 | Estimate | 93  | C7 | Oil well | 3.696  |
| 184 | Estimate | 95  | C7 | Oil well | 3.432  |
| 185 | Estimate | 152 | C6 | Oil well | 2.944  |
| 186 | Estimate | 94  | C7 | Oil well | 2.904  |
| 187 | Estimate | 96  | C6 | Gas well | 2.551  |
| 188 | Estimate | 90  | C8 | Oil well | 2.550  |
| 189 | Estimate | 88  | C8 | Facility | 2.241  |
| 190 | Estimate | 181 | C6 | Facility | 2.186  |
| 191 | Estimate | 156 | C6 | Facility | 2.165  |
| 192 | Estimate | 82  | C8 | Gas well | 2.118  |
| 193 | Estimate | 138 | C7 | Oil well | 2.087  |
| 194 | Estimate | 84  | C8 | Gas well | 1.540  |
| 195 | Estimate | 158 | C6 | Oil well | 1.425  |
| 196 | Estimate | 180 | C6 | Oil well | 1.343  |
| 197 | Estimate | 79  | C6 | Oil well | 1.199  |
| 198 | Estimate | 143 | C7 | Oil well | 1.196  |
| 199 | Estimate | 170 | C6 | Oil well | 1.172  |
| 200 | Estimate | 141 | C7 | Oil well | 1.120  |
| 201 | Estimate | 162 | C6 | Gas well | 0.862  |
| 202 | Estimate | 147 | C7 | Oil well | 0.849  |
| 203 | Estimate | 176 | C6 | Facility | 0.777  |
| 204 | Estimate | 146 | C7 | Oil well | 0.693  |
| 205 | Estimate | 165 | C6 | Facility | 0.683  |
| 206 | Estimate | 77  | C7 | Facility | 0.538  |
| 207 | Estimate | 153 | C6 | Oil well | 0.536  |
| 208 | Estimate | 83  | C8 | Gas well | 0.458  |
| 209 | Estimate | 76  | C6 | Facility | 0.446  |
| 210 | Estimate | 92  | C7 | Oil well | 0.440  |
| 211 | Estimate | 160 | C6 | Oil well | 0.413  |
| 212 | Estimate | 166 | C6 | Oil well | 0.366  |
| 213 | Estimate | 151 | C6 | Oil well | 0.322  |
| 214 | Estimate | 161 | C6 | Oil well | 0.257  |
| 215 | Estimate | 175 | C6 | Facility | 0.247  |
| 216 | Estimate | 144 | C7 | Oil well | 0.246  |
| 217 | Estimate | 154 | C6 | Oil well | 0.232  |
| 218 | Estimate | 157 | C6 | Oil well | 0.220  |

|     |          |     |     |                |        |
|-----|----------|-----|-----|----------------|--------|
| 219 | Estimate | 87  | C8  | Facility       | 0.215  |
| 220 | Estimate | 135 | C7  | Oil well       | 0.210  |
| 221 | Estimate | 171 | C6  | Oil well       | 0.175  |
| 222 | Estimate | 179 | C6  | Oil well       | 0.167  |
| 223 | Estimate | 139 | C7  | Oil well       | 0.165  |
| 224 | Estimate | 148 | C6  | Facility       | 0.160  |
| 225 | Estimate | 145 | C7  | Oil well       | 0.112  |
| 226 | Estimate | 80  | C8  | Gas well       | 0.094  |
| 227 | Estimate | 85  | C8  | Gas well       | 0.045  |
| 228 | Estimate | 142 | C7  | Oil well       | 0.045  |
| 229 | Estimate | 167 | C6  | Oil well       | 0.032  |
| 230 | Estimate | 178 | C6  | Oil well       | 0.029  |
| 231 | Estimate | 177 | C6  | Facility       | 0.015  |
| 232 | Estimate | 168 | C6  | Oil well       | 0.014  |
| 233 | Estimate | 164 | C6  | Oil well       | 0.006  |
| 234 | Estimate | 163 | C6  | Oil well       | 0.006  |
| 235 | Estimate | 150 | C6  | Oil well       | 0.005  |
| 236 | Estimate | 169 | C6  | Oil well       | 0.004  |
| 237 | Estimate | 174 | C6  | Oil well       | 0.003  |
| 238 | Estimate | 172 | C6  | Oil well       | 0.001  |
| 239 | MBA      | 318 | C8  | Oil park       | 50.640 |
| 240 | MBA      | 326 | C5A | Oil well       | 17.593 |
| 241 | MBA      | 317 | 6   | Gas facility   | 9.378  |
| 242 | MBA      | 316 | 7   | Oil deposit    | 7.848  |
| 243 | MBA      | 336 | C5A | Oil facility   | 7.526  |
| 244 | MBA      | 315 | 6   | Oil well       | 6.480  |
| 245 | MBA      | 339 | C5A | Oil well       | 5.575  |
| 246 | MBA      | 314 | 6   | Oil park       | 5.328  |
| 247 | MBA      | 331 | C4  | Oil well       | 4.822  |
| 248 | MBA      | 330 | C5A | Oil well       | 4.757  |
| 249 | MBA      | 313 | 6   | Oil well       | 4.080  |
| 250 | MBA      | 312 | 6   | Oil well       | 3.618  |
| 251 | MBA      | 340 | C5A | Oil well       | 3.331  |
| 252 | MBA      | 325 | C5A | Oil well       | 2.943  |
| 253 | MBA      | 324 | C5A | Oil well       | 2.630  |
| 254 | MBA      | 338 | C4  | Oil well       | 2.280  |
| 255 | MBA      | 311 | 6   | Oil well       | 2.148  |
| 256 | MBA      | 335 | C5A | Oil facility   | 2.033  |
| 257 | MBA      | 337 | C4  | Unknown        | 2.032  |
| 258 | MBA      | 319 | C2  | Oil well       | 1.927  |
| 259 | MBA      | 320 | C2  | Oil well       | 1.796  |
| 260 | MBA      | 310 | 6   | Oil park       | 1.716  |
| 261 | MBA      | 309 | 8   | Oil well       | 1.710  |
| 262 | MBA      | 308 | 6   | Oil well       | 1.467  |
| 263 | MBA      | 307 | 6   | Oil well       | 1.296  |
| 264 | MBA      | 306 | 8   | Oil well       | 0.960  |
| 265 | MBA      | 305 | 6   | Other facility | 0.918  |
| 266 | MBA      | 304 | 6   | Oil well       | 0.876  |

|     |       |     |     |          |       |
|-----|-------|-----|-----|----------|-------|
| 267 | MBA   | 303 | 6   | Oil well | 0.846 |
| 268 | MBA   | 321 | C5A | Oil well | 0.831 |
| 269 | MBA   | 302 | 6   | Oil well | 0.720 |
| 270 | MBA   | 327 | C5A | Oil well | 0.550 |
| 271 | MBA   | 301 | 6   | Oil park | 0.540 |
| 272 | MBA   | 322 | C4  | Oil well | 0.406 |
| 273 | MBA   | 342 | C5A | Oil well | 0.355 |
| 274 | MBA   | 300 | 7   | Oil well | 0.306 |
| 275 | MBA   | 299 | 6   | Oil well | 0.252 |
| 276 | MBA   | 333 | C2  | Gas well | 0.243 |
| 277 | MBA   | 323 | C5A | Oil well | 0.229 |
| 278 | MBA   | 298 | 7   | Oil well | 0.198 |
| 279 | MBA   | 334 | C5A | Oil well | 0.196 |
| 280 | MBA   | 341 | C2  | Unknown  | 0.176 |
| 281 | MBA   | 329 | C5A | Oil well | 0.106 |
| 282 | MBA   | 332 | C2  | Gas well | 0.042 |
| 283 | MBA   | 328 | C5A | Oil well | 0.000 |
| 284 | BDL** | 187 | C7  | Oil well | 0.803 |
| 285 | BDL** | 183 | C7  | Oil well | 0.459 |
| 286 | BDL** | 186 | C7  | Oil well | 0.360 |
| 287 | BDL** | 197 | C6  | Oil well | 0.250 |
| 288 | BDL** | 199 | C6  | Oil well | 0.123 |
| 289 | BDL** | 182 | C7  | Oil well | 0.112 |
| 290 | BDL** | 106 | C7  | Gas well | 0.105 |
| 291 | BDL** | 196 | C6  | Oil well | 0.080 |
| 292 | BDL** | 110 | C8  | Oil well | 0.079 |
| 293 | BDL** | 112 | C8  | Gas well | 0.079 |
| 294 | BDL** | 115 | C8  | Gas well | 0.079 |
| 295 | BDL** | 184 | C7  | Gas well | 0.051 |
| 296 | BDL** | 188 | C7  | Oil well | 0.049 |
| 297 | BDL** | 117 | C8  | Gas well | 0.039 |
| 298 | BDL** | 119 | C8  | Gas well | 0.039 |
| 299 | BDL** | 121 | C8  | Gas well | 0.039 |
| 300 | BDL** | 195 | C6  | Facility | 0.033 |
| 301 | BDL** | 189 | C7  | Oil well | 0.033 |
| 302 | BDL** | 131 | C7  | Oil well | 0.030 |
| 303 | BDL** | 133 | C7  | Oil well | 0.030 |
| 304 | BDL** | 134 | C7  | Oil well | 0.030 |
| 305 | BDL** | 200 | C6  | Oil well | 0.013 |
| 306 | BDL** | 103 | C7  | Oil well | 0.012 |
| 307 | BDL** | 102 | C6  | Oil well | 0.010 |
| 308 | BDL** | 185 | C7  | Oil well | 0.009 |
| 309 | BDL** | 194 | C6  | Oil well | 0.008 |
| 310 | BDL** | 108 | C7  | Oil well | 0.007 |
| 311 | BDL** | 109 | C7  | Oil well | 0.007 |
| 312 | BDL** | 113 | C8  | Gas well | 0.006 |
| 313 | BDL** | 114 | C8  | Gas well | 0.006 |
| 314 | BDL** | 104 | C7  | Oil well | 0.006 |

|     |       |     |     |          |       |
|-----|-------|-----|-----|----------|-------|
| 315 | BDL** | 105 | C7  | Oil well | 0.006 |
| 316 | BDL** | 107 | C7  | Oil well | 0.006 |
| 317 | BDL** | 111 | C8  | Gas well | 0.006 |
| 318 | BDL** | 192 | C6  | Oil well | 0.004 |
| 319 | BDL** | 124 | C8  | Gas well | 0.003 |
| 320 | BDL** | 125 | C8  | Gas well | 0.003 |
| 321 | BDL** | 190 | C7  | Oil well | 0.003 |
| 322 | BDL** | 127 | C8  | Gas well | 0.003 |
| 323 | BDL** | 128 | C8  | Gas well | 0.003 |
| 324 | BDL** | 129 | C8  | Gas well | 0.003 |
| 325 | BDL** | 130 | C7  | Oil well | 0.003 |
| 326 | BDL** | 132 | C7  | Oil well | 0.002 |
| 327 | BDL** | 120 | C8  | Oil well | 0.002 |
| 328 | BDL** | 122 | C8  | Oil well | 0.002 |
| 329 | BDL** | 126 | C8  | Oil well | 0.002 |
| 330 | BDL** | 191 | C7  | Oil well | 0.001 |
| 331 | BDL** | 193 | C6  | Facility | 0.001 |
| 332 | BDL** | 198 | C6  | Oil well | 0.001 |
| 333 | BDL** | 123 | C8  | Facility | 0.001 |
| 334 | BDL** | 99  | C7  | Gas well | 0.001 |
| 335 | BDL** | 100 | C5A | Oil well | 0.001 |
| 336 | BDL** | 101 | C5A | Oil well | 0.001 |
| 337 | BDL** | 116 | C8  | Facility | 0.000 |
| 338 | BDL** | 118 | C8  | Facility | 0.000 |

584 \*Emission rate for this site is the sum of quantified emissions from a group of three sites  
585 where their contribution to the measured emission plume could not be distinguished.

586 \*\*BDL values are only used for the derivation of the detection limit and the fraction of  
587 non-detects for the TDM dataset. They are not used for the emission quantification.

588

## 589 **References**

590 Alvarez, R. A., Zavala-Araiza, D., Lyon, D. R., Allen, D. T., Barkley, Z. R., Brandt, A. R., Davis, K. J., Herndon,  
591 S. C., Jacob, D. J., Karion, A., Kort, E. A., Lamb, B. K., Lauvaux, T., Maasackers, J. D., Marchese, A. J., Omara,  
592 M., Pacala, S. W., Peischl, J., Robinson, A. L., Shepson, P. B., Sweeney, C., Townsend-Small, A., Wofsy, S.  
593 C., and Hamburg, S. P.: Assessment of methane emissions from the U.S. oil and gas supply chain, *Science*,  
594 361, 186–188, <https://doi.org/10.1126/science.aar7204>, 2018.

595 Bacharach, I. N. C.: Hi flowR sampler for natural gas leak rate measurement, 2015.

596 Canty, A. and Ripley, B.: boot: Bootstrap R (S-Plus) Functions., R package version 1.3-28, 2021.

597 Delre, A., Hensen, A., Velzeboer, I., van den Bulk, P., Edjabou, M. E., and Scheutz, C.: Methane and ethane  
598 emission quantifications from onshore oil and gas sites in Romania, using a tracer gas dispersion method,  
599 *Elementa: Science of the Anthropocene*, 10, 000111, <https://doi.org/10.1525/elementa.2021.000111>,  
600 2022.

601 Hanna, S. R., Briggs, G. A., and Hosker, J.: Handbook on atmospheric diffusion, National Oceanic and  
602 Atmospheric Administration, Oak Ridge, TN (USA). Atmospheric Turbulence and Diffusion Lab.,  
603 <https://doi.org/10.2172/5591108>, 1982.

604 Korbeń, P., Jagoda, P., Maazallahi, H., Kammerer, J., Necki, J. M., Wietzel, J. B., Bartyzel, J., Radovici, A.,  
605 Zavala-Araiza, D., Röckmann, T., and Schmidt, M.: Quantification of methane emission rate from oil and  
606 gas wells in Romania using ground-based measurement techniques, *Elementa: Science of the*  
607 *Anthropocene*, 10, 00070, <https://doi.org/10.1525/elementa.2022.00070>, 2022.

608 Lyman, S. N., Tran, T., Mansfield, M. L., and Ravikumar, A. P.: Aerial and ground-based optical gas imaging  
609 survey of Uinta Basin oil and gas wells, *Elementa: Science of the Anthropocene*, 7, 43,  
610 <https://doi.org/10.1525/elementa.381>, 2019.

611 Razali, N. M. and Wah, Y. B.: Power comparisons of shapiro-wilk, kolmogorov-smirnov, lilliefors and  
612 anderson-darling tests, *Journal of statistical modeling and analytics*, 2, 21–33, 2011.

613 Riddick, S. N., Connors, S., Robinson, A. D., Manning, A. J., Jones, P. S. D., Lowry, D., Nisbet, E., Skelton, R.  
614 L., Allen, G., Pitt, J., and Harris, N. R. P.: Estimating the size of a methane emission point source at different  
615 scales: from local to landscape, *Atmospheric Chemistry and Physics*, 17, 7839–7851,  
616 <https://doi.org/10.5194/acp-17-7839-2017>, 2017.

617 Robertson, A. M., Edie, R., Field, R. A., Lyon, D., McVay, R., Omara, M., Zavala-Araiza, D., and Murphy, S.  
618 M.: New Mexico Permian Basin Measured Well Pad Methane Emissions Are a Factor of 5–9 Times Higher  
619 Than U.S. EPA Estimates, *Environ. Sci. Technol.*, 54, 13926–13934,  
620 <https://doi.org/10.1021/acs.est.0c02927>, 2020.

621 Ruckstuhl, A. F., Henne, S., Reimann, S., Steinbacher, M., Vollmer, M. K., O’Doherty, S., Buchmann, B., and  
622 Hueglin, C.: Robust extraction of baseline signal of atmospheric trace species using local regression,  
623 *Atmospheric Measurement Techniques*, 5, 2613–2624, <https://doi.org/10.5194/amt-5-2613-2012>, 2012.

624 Seabold, S. and Perktold, J.: *statsmodels: Econometric and statistical modeling with python*, 9th Python in  
625 Science Conference., 2010.

626 Turner, D.: *Workbook of atmospheric dispersion estimates (Office of Air Program Pub. No. AP-26)*,  
627 Washington, DC: Environmental Protection Agency, 1970.

628 Vinković, K., Andersen, T., de Vries, M., Kers, B., van Heuven, S., Peters, W., Hensen, A., van den Bulk, P.,  
629 and Chen, H.: Evaluating the use of an Unmanned Aerial Vehicle (UAV)-based active AirCore system to  
630 quantify methane emissions from dairy cows, *Science of The Total Environment*, 831, 154898,  
631 <https://doi.org/10.1016/j.scitotenv.2022.154898>, 2022.

632 Virtanen, P., Gommers, R., Oliphant, T. E., Haberland, M., Reddy, T., Cournapeau, D., Burovski, E.,  
633 Peterson, P., Weckesser, W., Bright, J., van der Walt, S. J., Brett, M., Wilson, J., Millman, K. J., Mayorov,  
634 N., Nelson, A. R. J., Jones, E., Kern, R., Larson, E., Carey, C. J., Polat, İ., Feng, Y., Moore, E. W., VanderPlas,  
635 J., Laxalde, D., Perktold, J., Cimrman, R., Henriksen, I., Quintero, E. A., Harris, C. R., Archibald, A. M.,  
636 Ribeiro, A. H., Pedregosa, F., van Mulbregt, P., SciPy 1.0 Contributors, Vijaykumar, A., Bardelli, A. P.,  
637 Rothberg, A., Hilboll, A., Kloeckner, A., Scopatz, A., Lee, A., Rokem, A., Woods, C. N., Fulton, C., Masson,  
638 C., Häggström, C., Fitzgerald, C., Nicholson, D. A., Hagen, D. R., Pasechnik, D. V., Olivetti, E., Martin, E.,  
639 Wieser, E., Silva, F., Lenders, F., Wilhelm, F., Young, G., Price, G. A., Ingold, G.-L., Allen, G. E., Lee, G. R.,  
640 Audren, H., Probst, I., Dietrich, J. P., Silterra, J., Webber, J. T., Slavič, J., Nothman, J., Buchner, J., Kulick, J.,  
641 Schönberger, J. L., de Miranda Cardoso, J. V., Reimer, J., Harrington, J., Rodríguez, J. L. C., Nunez-Iglesias,  
642 J., Kuczynski, J., Tritz, K., Thoma, M., Newville, M., Kümmerer, M., Bolingbroke, M., Tartre, M., Pak, M.,  
643 Smith, N. J., Nowaczyk, N., Shebanov, N., Pavlyk, O., Brodtkorb, P. A., Lee, P., McGibbon, R. T., Feldbauer,  
644 R., Lewis, S., Tygier, S., Sievert, S., Vigna, S., Peterson, S., More, S., et al.: *SciPy 1.0: fundamental algorithms*  
645 *for scientific computing in Python*, *Nat Methods*, 17, 261–272, [https://doi.org/10.1038/s41592-019-0686-](https://doi.org/10.1038/s41592-019-0686-2)  
646 2, 2020.

- 647 Yacovitch, T. I., Herndon, S. C., Pétron, G., Kofler, J., Lyon, D., Zahniser, M. S., and Kolb, C. E.: Mobile  
648 Laboratory Observations of Methane Emissions in the Barnett Shale Region, *Environ. Sci. Technol.*, 49,  
649 7889–7895, <https://doi.org/10.1021/es506352j>, 2015.
- 650 Zavala-Araiza, D., Lyon, D. R., Alvarez, R. A., Davis, K. J., Harriss, R., Herndon, S. C., Karion, A., Kort, E. A.,  
651 Lamb, B. K., Lan, X., Marchese, A. J., Pacala, S. W., Robinson, A. L., Shepson, P. B., Sweeney, C., Talbot, R.,  
652 Townsend-Small, A., Yacovitch, T. I., Zimmerle, D. J., and Hamburg, S. P.: Reconciling divergent estimates  
653 of oil and gas methane emissions, *Proceedings of the National Academy of Sciences*, 112, 15597–15602,  
654 <https://doi.org/10.1073/pnas.1522126112>, 2015.
- 655 Zavala-Araiza, D., Herndon, S. C., Roscioli, J. R., Yacovitch, T. I., Johnson, M. R., Tyner, D. R., Omara, M.,  
656 and Knighton, B.: Methane emissions from oil and gas production sites in Alberta, Canada, *Elementa: Science of the Anthropocene*, 6, 27, <https://doi.org/10.1525/elementa.284>, 2018.
